# Supplementary material for: Yellow Fever Virus Maintained by Sabethes Mosquitoes during the Dry Season in Cerrado, a Semiarid Region of Brazil, in 2021
Source: MDPI journal article supplement (doi:10.3390/v15030757), 2023-03-15
Supplement: s1 [file s1]

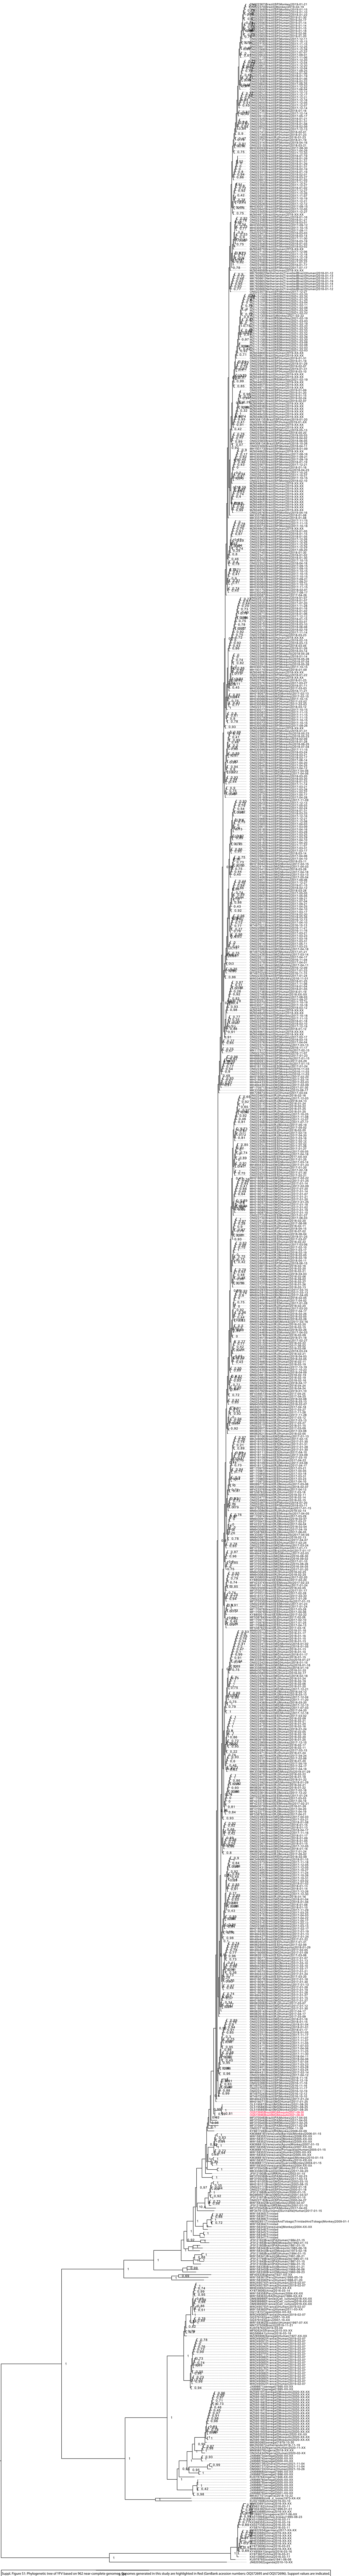



Suppl. Table S2: List of all sequences used as well as metadata, including geographic information.

| Name     | Collection_date | Host     | isolate | Country           | State             | Friendly Name                                  |
|----------|-----------------|----------|---------|-------------------|-------------------|------------------------------------------------|
| HM582851 | 2009-01-15      | Monkey   |         | TrinidadAndTobago | TrinidadAndTobago | HM582851 TrinidadAndTobago Monkey 2009-01-15   |
| JF912179 | 1980-01-15      | Mosquito |         | Brazil            | GO                | JF912179 Brazil GO Mosquito 1980-01-15         |
| JF912180 | 1981-01-15      | Human    |         | Brazil            | PA                | JF912180 Brazil PA Human 1981-01-15            |
| JF912182 | 1984-01-15      | Human    |         | Brazil            | PA                | JF912182 Brazil PA Human 1984-01-15            |
| JF912183 | 1984-01-15      | Human    |         | Brazil            | PA                | JF912183 Brazil PA Human 1984-01-15            |
| JF912184 | 1987-01-15      | Human    |         | Brazil            | PA                | JF912184 Brazil PA Human 1987-01-15            |
| JF912185 | 1992-01-15      | Mosquito |         | Brazil            | MS                | JF912185 Brazil MS Mosquito 1992-01-15         |
| JF912186 | 1994-01-15      | Human    |         | Brazil            | MG                | JF912186 Brazil MG Human 1994-01-15            |
| JF912187 | 2000-01-15      | Human    |         | Brazil            | GO                | JF912187 Brazil GO Human 2000-01-15            |
| JF912188 | 2000-01-15      | Human    |         | Brazil            | GO                | JF912188 Brazil GO Human 2000-01-15            |
| JF912189 | 2001-01-15      | Mosquito |         | Brazil            | RS                | JF912189 Brazil RS Mosquito 2001-01-15         |
| JF912190 | 2002-01-15      | Human    |         | Brazil            | RR                | JF912190 Brazil RR Human 2002-01-15            |
| KM388814 | 2005-01-15      | Human    |         | Venezuela         | Portuguesa        | KM388814 Venezuela Portuguesa Human 2005-01-15 |
| KM388815 | 2007-01-15      | Monkey   |         | Venezuela         | Apure             | KM388815 Venezuela Apure Monkey 2007-01-15     |
| KM388816 | 2010-01-15      | Monkey   |         | Venezuela         | Monagas           | KM388816 Venezuela Monagas Monkey 2010-01-15   |
| KM388817 | 2004-01-15      | Monkey   |         | Venezuela         | Guarico           | KM388817 Venezuela Guarico Monkey 2004-01-15   |
| KM388818 | 2006-01-15      | Monkey   |         | Venezuela         | Barinas           | KM388818 Venezuela Barinas Monkey 2006-01-15   |
| KY861728 | 2008-02-09      | Monkey   |         | Brazil            | RS                | KY861728 Brazil RS Monkey 2008-02-09           |
| KY885000 | 2017-02-20      | Monkey   |         | Brazil            | ES                | KY885000 Brazil ES Monkey 2017-02-20           |
| KY885001 | 2017-02-22      | Monkey   |         | Brazil            | ES                | KY885001 Brazil ES Monkey 2017-02-22           |
| MF170968 | 2017-04-13      | Human    |         | Brazil            | ES                | MF170968 Brazil ES Human 2017-04-13            |
| MF170969 | 2017-03-18      | Human    |         | Brazil            | ES                | MF170969 Brazil ES Human 2017-03-18            |
| MF170970 | 2017-03-21      | Human    |         | Brazil            | ES                | MF170970 Brazil ES Human 2017-03-21            |
| MF170971 | 2017-01-30      | Monkey   |         | Brazil            | MG                | MF170971 Brazil MG Monkey 2017-01-30           |
| MF170972 | 2017-03-31      | Human    |         | Brazil            | ES                | MF170972 Brazil ES Human 2017-03-31            |
| MF170973 | 2017-04-10      | Human    |         | Brazil            | ES                | MF170973 Brazil ES Human 2017-04-10            |
| MF170974 | 2017-03-29      | Human    |         | Brazil            | ES                | MF170974 Brazil ES Human 2017-03-29            |
| MF170975 | 2017-03-03      | Human    |         | Brazil            | ES                | MF170975 Brazil ES Human 2017-03-03            |
| MF170976 | 2017-01-25      | Human    |         | Brazil            | ES                | MF170976 Brazil ES Human 2017-01-25            |
| MF170977 | 2017-02-10      | Human    |         | Brazil            | ES                | MF170977 Brazil ES Human 2017-02-10            |
| MF170978 | 2017-03-28      | Human    |         | Brazil            | ES                | MF170978 Brazil ES Human 2017-03-28            |
| MF170979 | 2017-04-06      | Human    |         | Brazil            | ES                | MF170979 Brazil ES Human 2017-04-06            |
| MF170980 | 2017-03-23      | Human    |         | Brazil            | ES                | MF170980 Brazil ES Human 2017-03-23            |

|          |            |          |          |          |                                             |
|----------|------------|----------|----------|----------|---------------------------------------------|
| MF170981 | 2017-04-05 | Human    | Brazil   | ES       | MF170981 Brazil ES Human 2017-04-05         |
| MF347613 | 2017-01-15 | Human    | Suriname | Suriname | MF347613 Suriname Suriname Human 2017-01-15 |
| MF370530 | 2017-01-15 | Mosquito | Brazil   | MG       | MF370530 Brazil MG Mosquito 2017-01-15      |
| MF370531 | 2017-02-28 | Human    | Brazil   | ES       | MF370531 Brazil ES Human 2017-02-28         |
| MF370532 | 2017-01-10 | Human    | Brazil   | MG       | MF370532 Brazil MG Human 2017-01-10         |
| MF370533 | 2017-01-11 | Human    | Brazil   | MG       | MF370533 Brazil MG Human 2017-01-11         |
| MF370534 | 2016-04-05 | Monkey   | Brazil   | MG       | MF370534 Brazil MG Monkey 2016-04-05        |
| MF370535 | 2016-08-30 | Monkey   | Brazil   | MG       | MF370535 Brazil MG Monkey 2016-08-30        |
| MF370536 | 2016-09-02 | Monkey   | Brazil   | MG       | MF370536 Brazil MG Monkey 2016-09-02        |
| MF370537 | 2017-01-17 | Monkey   | Brazil   | ES       | MF370537 Brazil ES Monkey 2017-01-17        |
| MF370538 | 2017-01-20 | Monkey   | Brazil   | MG       | MF370538 Brazil MG Monkey 2017-01-20        |
| MF370539 | 2017-02-23 | Monkey   | Brazil   | PA       | MF370539 Brazil PA Monkey 2017-02-23        |
| MF370540 | 2017-02-25 | Monkey   | Brazil   | RR       | MF370540 Brazil RR Monkey 2017-02-25        |
| MF370541 | 2017-02-28 | Monkey   | Brazil   | PA       | MF370541 Brazil PA Monkey 2017-02-28        |
| MF370542 | 2017-03-14 | Monkey   | Brazil   | PA       | MF370542 Brazil PA Monkey 2017-03-14        |
| MF370543 | 2017-03-03 | Monkey   | Brazil   | MT       | MF370543 Brazil MT Monkey 2017-03-03        |
| MF370544 | 2017-04-05 | Monkey   | Brazil   | PA       | MF370544 Brazil PA Monkey 2017-04-05        |
| MF370545 | 2017-04-05 | Monkey   | Brazil   | PA       | MF370545 Brazil PA Monkey 2017-04-05        |
| MF370546 | 2017-04-05 | Monkey   | Brazil   | PA       | MF370546 Brazil PA Monkey 2017-04-05        |
| MF370547 | 2017-03-27 | Monkey   | Brazil   | RJ       | MF370547 Brazil RJ Monkey 2017-03-27        |
| MF370548 | 2017-04-20 | Monkey   | Brazil   | RJ       | MF370548 Brazil RJ Monkey 2017-04-20        |
| MF370549 | 2015-08-26 | Monkey   | Brazil   | MG       | MF370549 Brazil MG Monkey 2015-08-26        |
| MF423373 | 2017-02-21 | Mosquito | Brazil   | ES       | MF423373 Brazil ES Mosquito 2017-02-21      |
| MF423374 | 2017-02-23 | Mosquito | Brazil   | ES       | MF423374 Brazil ES Mosquito 2017-02-23      |
| MF423375 | 2017-04-04 | Monkey   | Brazil   | RJ       | MF423375 Brazil RJ Monkey 2017-04-04        |
| MF423376 | 2017-04-13 | Monkey   | Brazil   | RJ       | MF423376 Brazil RJ Monkey 2017-04-13        |
| MF423377 | 2017-04-19 | Monkey   | Brazil   | RJ       | MF423377 Brazil RJ Monkey 2017-04-19        |
| MF423378 | 2017-04-19 | Monkey   | Brazil   | RJ       | MF423378 Brazil RJ Monkey 2017-04-19        |
| MF434851 | 2017-04-25 | Human    | Brazil   | RJ       | MF434851 Brazil RJ Human 2017-04-25         |
| MF465805 | 2017-01-17 | Human    | Brazil   | Brazil   | MF465805 Brazil Brazil Human 2017-01-17     |
| MF538782 | 2017-03-16 | Human    | Brazil   | RJ       | MF538782 Brazil RJ Human 2017-03-16         |
| MF538783 | 2017-03-18 | Human    | Brazil   | RJ       | MF538783 Brazil RJ Human 2017-03-18         |
| MF538784 | 2017-02-26 | Human    | Brazil   | RJ       | MF538784 Brazil RJ Human 2017-02-26         |
| MF538785 | 2017-04-21 | Monkey   | Brazil   | RJ       | MF538785 Brazil RJ Monkey 2017-04-21        |

|          |            |        |        |    |                                      |
|----------|------------|--------|--------|----|--------------------------------------|
| MF538786 | 2017-06-05 | Monkey | Brazil | RJ | MF538786 Brazil RJ Monkey 2017-06-05 |
| MG550109 | 2017-04-18 | Human  | Brazil | RJ | MG550109 Brazil RJ Human 2017-04-18  |
| MG969501 | 2001-03-07 | Human  | Brazil | MG | MG969501 Brazil MG Human 2001-03-07  |
| MH018064 | 2017-02-15 | Monkey | Brazil | MG | MH018064 Brazil MG Monkey 2017-02-15 |
| MH018065 | 2017-02-14 | Monkey | Brazil | MG | MH018065 Brazil MG Monkey 2017-02-14 |
| MH018066 | 2017-02-15 | Monkey | Brazil | MG | MH018066 Brazil MG Monkey 2017-02-15 |
| MH018067 | 2017-02-13 | Monkey | Brazil | MG | MH018067 Brazil MG Monkey 2017-02-13 |
| MH018068 | 2017-01-09 | Human  | Brazil | MG | MH018068 Brazil MG Human 2017-01-09  |
| MH018069 | 2017-01-14 | Human  | Brazil | MG | MH018069 Brazil MG Human 2017-01-14  |
| MH018070 | 2017-01-21 | Human  | Brazil | MG | MH018070 Brazil MG Human 2017-01-21  |
| MH018071 | 2017-01-25 | Human  | Brazil | MG | MH018071 Brazil MG Human 2017-01-25  |
| MH018072 | 2017-01-07 | Human  | Brazil | MG | MH018072 Brazil MG Human 2017-01-07  |
| MH018073 | 2017-01-20 | Human  | Brazil | MG | MH018073 Brazil MG Human 2017-01-20  |
| MH018074 | 2017-01-14 | Human  | Brazil | MG | MH018074 Brazil MG Human 2017-01-14  |
| MH018075 | 2017-01-18 | Human  | Brazil | MG | MH018075 Brazil MG Human 2017-01-18  |
| MH018076 | 2017-01-19 | Human  | Brazil | MG | MH018076 Brazil MG Human 2017-01-19  |
| MH018077 | 2017-01-07 | Human  | Brazil | MG | MH018077 Brazil MG Human 2017-01-07  |
| MH018078 | 2017-01-18 | Human  | Brazil | MG | MH018078 Brazil MG Human 2017-01-18  |
| MH018079 | 2017-01-28 | Human  | Brazil | MG | MH018079 Brazil MG Human 2017-01-28  |
| MH018080 | 2017-01-28 | Human  | Brazil | MG | MH018080 Brazil MG Human 2017-01-28  |
| MH018081 | 2017-02-22 | Monkey | Brazil | MG | MH018081 Brazil MG Monkey 2017-02-22 |
| MH018082 | 2017-02-20 | Monkey | Brazil | MG | MH018082 Brazil MG Monkey 2017-02-20 |
| MH018083 | 2017-02-17 | Monkey | Brazil | MG | MH018083 Brazil MG Monkey 2017-02-17 |
| MH018084 | 2017-02-09 | Monkey | Brazil | MG | MH018084 Brazil MG Monkey 2017-02-09 |
| MH018085 | 2017-01-13 | Human  | Brazil | MG | MH018085 Brazil MG Human 2017-01-13  |
| MH018086 | 2017-01-19 | Human  | Brazil | MG | MH018086 Brazil MG Human 2017-01-19  |
| MH018087 | 2017-01-10 | Human  | Brazil | MG | MH018087 Brazil MG Human 2017-01-10  |
| MH018088 | 2017-01-21 | Human  | Brazil | MG | MH018088 Brazil MG Human 2017-01-21  |
| MH018089 | 2017-01-02 | Human  | Brazil | MG | MH018089 Brazil MG Human 2017-01-02  |
| MH018090 | 2017-01-12 | Human  | Brazil | MG | MH018090 Brazil MG Human 2017-01-12  |
| MH018091 | 2017-01-30 | Human  | Brazil | MG | MH018091 Brazil MG Human 2017-01-30  |
| MH018092 | 2017-01-27 | Human  | Brazil | MG | MH018092 Brazil MG Human 2017-01-27  |
| MH018093 | 2017-01-20 | Human  | Brazil | MG | MH018093 Brazil MG Human 2017-01-20  |
| MH018094 | 2017-01-30 | Human  | Brazil | MG | MH018094 Brazil MG Human 2017-01-30  |

|          |            |        |        |    |                                      |
|----------|------------|--------|--------|----|--------------------------------------|
| MH018095 | 2017-01-19 | Monkey | Brazil | MG | MH018095 Brazil MG Monkey 2017-01-19 |
| MH018096 | 2017-01-13 | Monkey | Brazil | MG | MH018096 Brazil MG Monkey 2017-01-13 |
| MH018097 | 2017-01-25 | Monkey | Brazil | MG | MH018097 Brazil MG Monkey 2017-01-25 |
| MH018098 | 2017-01-25 | Monkey | Brazil | MG | MH018098 Brazil MG Monkey 2017-01-25 |
| MH018099 | 2017-03-10 | Monkey | Brazil | BA | MH018099 Brazil BA Monkey 2017-03-10 |
| MH018100 | 2003-03-15 | Human  | Brazil | MG | MH018100 Brazil MG Human 2003-03-15  |
| MH018101 | 2003-08-15 | Human  | Brazil | MG | MH018101 Brazil MG Human 2003-08-15  |
| MH018102 | 2017-01-31 | Monkey | Brazil | ES | MH018102 Brazil ES Monkey 2017-01-31 |
| MH018103 | 2017-01-30 | Human  | Brazil | MG | MH018103 Brazil MG Human 2017-01-30  |
| MH018104 | 2017-01-30 | Human  | Brazil | MG | MH018104 Brazil MG Human 2017-01-30  |
| MH018105 | 2017-01-28 | Human  | Brazil | MG | MH018105 Brazil MG Human 2017-01-28  |
| MH018106 | 2017-01-13 | Monkey | Brazil | MG | MH018106 Brazil MG Monkey 2017-01-13 |
| MH018107 | 2017-02-22 | Human  | Brazil | ES | MH018107 Brazil ES Human 2017-02-22  |
| MH018108 | 2017-03-10 | Human  | Brazil | ES | MH018108 Brazil ES Human 2017-03-10  |
| MH018109 | 2017-03-08 | Monkey | Brazil | ES | MH018109 Brazil ES Monkey 2017-03-08 |
| MH018110 | 2017-03-09 | Monkey | Brazil | ES | MH018110 Brazil ES Monkey 2017-03-09 |
| MH018111 | 2017-04-10 | Human  | Brazil | ES | MH018111 Brazil ES Human 2017-04-10  |
| MH018112 | 2017-04-17 | Monkey | Brazil | RJ | MH018112 Brazil RJ Monkey 2017-04-17 |
| MH018113 | 2017-04-22 | Human  | Brazil | RJ | MH018113 Brazil RJ Human 2017-04-22  |
| MH018114 | 2017-01-24 | Monkey | Brazil | ES | MH018114 Brazil ES Monkey 2017-01-24 |
| MH018115 | 2017-01-24 | Monkey | Brazil | ES | MH018115 Brazil ES Monkey 2017-01-24 |
| MH030049 | 2017-08-17 | Monkey | Brazil | SP | MH030049 Brazil SP Monkey 2017-08-17 |
| MH030050 | 2017-08-16 | Monkey | Brazil | SP | MH030050 Brazil SP Monkey 2017-08-16 |
| MH030051 | 2017-09-15 | Monkey | Brazil | SP | MH030051 Brazil SP Monkey 2017-09-15 |
| MH030052 | 2017-09-15 | Monkey | Brazil | SP | MH030052 Brazil SP Monkey 2017-09-15 |
| MH030053 | 2017-08-30 | Monkey | Brazil | SP | MH030053 Brazil SP Monkey 2017-08-30 |
| MH030054 | 2017-09-15 | Monkey | Brazil | SP | MH030054 Brazil SP Monkey 2017-09-15 |
| MH030055 | 2017-09-11 | Monkey | Brazil | SP | MH030055 Brazil SP Monkey 2017-09-11 |
| MH030056 | 2017-09-12 | Monkey | Brazil | SP | MH030056 Brazil SP Monkey 2017-09-12 |
| MH030057 | 2017-09-27 | Monkey | Brazil | SP | MH030057 Brazil SP Monkey 2017-09-27 |
| MH030058 | 2017-09-26 | Monkey | Brazil | SP | MH030058 Brazil SP Monkey 2017-09-26 |
| MH030059 | 2017-09-21 | Monkey | Brazil | SP | MH030059 Brazil SP Monkey 2017-09-21 |
| MH030060 | 2017-09-27 | Monkey | Brazil | SP | MH030060 Brazil SP Monkey 2017-09-27 |
| MH030061 | 2017-09-21 | Monkey | Brazil | SP | MH030061 Brazil SP Monkey 2017-09-21 |

|          |            |          |        |    |                                        |
|----------|------------|----------|--------|----|----------------------------------------|
| MH030062 | 2017-09-19 | Monkey   | Brazil | SP | MH030062 Brazil SP Monkey 2017-09-19   |
| MH030063 | 2017-10-15 | Monkey   | Brazil | SP | MH030063 Brazil SP Monkey 2017-10-15   |
| MH030064 | 2017-10-15 | Monkey   | Brazil | SP | MH030064 Brazil SP Monkey 2017-10-15   |
| MH030065 | 2017-10-15 | Monkey   | Brazil | SP | MH030065 Brazil SP Monkey 2017-10-15   |
| MH030066 | 2017-10-15 | Monkey   | Brazil | SP | MH030066 Brazil SP Monkey 2017-10-15   |
| MH030067 | 2017-10-15 | Monkey   | Brazil | SP | MH030067 Brazil SP Monkey 2017-10-15   |
| MH030068 | 2017-10-15 | Monkey   | Brazil | SP | MH030068 Brazil SP Monkey 2017-10-15   |
| MH030069 | 2017-10-15 | Monkey   | Brazil | SP | MH030069 Brazil SP Monkey 2017-10-15   |
| MH030070 | 2017-10-19 | Monkey   | Brazil | SP | MH030070 Brazil SP Monkey 2017-10-19   |
| MH030071 | 2017-10-18 | Monkey   | Brazil | SP | MH030071 Brazil SP Monkey 2017-10-18   |
| MH030072 | 2017-10-15 | Monkey   | Brazil | SP | MH030072 Brazil SP Monkey 2017-10-15   |
| MH030073 | 2017-10-18 | Monkey   | Brazil | SP | MH030073 Brazil SP Monkey 2017-10-18   |
| MH030074 | 2017-10-18 | Monkey   | Brazil | SP | MH030074 Brazil SP Monkey 2017-10-18   |
| MH030075 | 2017-10-15 | Monkey   | Brazil | SP | MH030075 Brazil SP Monkey 2017-10-15   |
| MH030076 | 2017-10-15 | Monkey   | Brazil | SP | MH030076 Brazil SP Monkey 2017-10-15   |
| MH030077 | 2017-10-15 | Monkey   | Brazil | SP | MH030077 Brazil SP Monkey 2017-10-15   |
| MH030078 | 2017-10-15 | Monkey   | Brazil | SP | MH030078 Brazil SP Monkey 2017-10-15   |
| MH030079 | 2017-11-15 | Monkey   | Brazil | SP | MH030079 Brazil SP Monkey 2017-11-15   |
| MH030080 | 2017-11-15 | Monkey   | Brazil | SP | MH030080 Brazil SP Monkey 2017-11-15   |
| MH030081 | 2017-11-15 | Monkey   | Brazil | SP | MH030081 Brazil SP Monkey 2017-11-15   |
| MH030082 | 2017-11-15 | Monkey   | Brazil | SP | MH030082 Brazil SP Monkey 2017-11-15   |
| MH030083 | 2017-11-15 | Monkey   | Brazil | SP | MH030083 Brazil SP Monkey 2017-11-15   |
| MH030084 | 2017-11-15 | Monkey   | Brazil | SP | MH030084 Brazil SP Monkey 2017-11-15   |
| MH030085 | 2017-11-15 | Monkey   | Brazil | SP | MH030085 Brazil SP Monkey 2017-11-15   |
| MH030086 | 2017-11-15 | Monkey   | Brazil | SP | MH030086 Brazil SP Monkey 2017-11-15   |
| MH030087 | 2017-04-26 | Human    | Brazil | SP | MH030087 Brazil SP Human 2017-04-26    |
| MH030088 | 2017-03-03 | Human    | Brazil | SP | MH030088 Brazil SP Human 2017-03-03    |
| MH030089 | 2017-03-03 | Human    | Brazil | SP | MH030089 Brazil SP Human 2017-03-03    |
| MH030090 | 2017-03-02 | Human    | Brazil | SP | MH030090 Brazil SP Human 2017-03-02    |
| MH030091 | 2017-03-29 | Human    | Brazil | SP | MH030091 Brazil SP Human 2017-03-29    |
| MH193173 | 2018-01-09 | Monkey   | Brazil | SP | MH193173 Brazil SP Monkey 2018-01-09   |
| MH193174 | 2018-01-09 | Human    | Brazil | SP | MH193174 Brazil SP Human 2018-01-09    |
| MH193175 | 2018-02-01 | Monkey   | Brazil | SP | MH193175 Brazil SP Monkey 2018-02-01   |
| MH329655 | 2018-01-29 | Mosquito | Brazil | MG | MH329655 Brazil MG Mosquito 2018-01-29 |

|          |            |          |        |        |                                         |
|----------|------------|----------|--------|--------|-----------------------------------------|
| MH378284 | 2017-01-15 | Human    | Brazil | Brazil | MH378284 Brazil Brazil Human 2017-01-15 |
| MH484423 | 2017-01-24 | Monkey   | Brazil | MG     | MH484423 Brazil MG Monkey 2017-01-24    |
| MH484424 | 2017-01-24 | Human    | Brazil | MG     | MH484424 Brazil MG Human 2017-01-24     |
| MH484425 | 2017-01-27 | Human    | Brazil | MG     | MH484425 Brazil MG Human 2017-01-27     |
| MH484426 | 2017-01-13 | Monkey   | Brazil | MG     | MH484426 Brazil MG Monkey 2017-01-13    |
| MH484427 | 2017-01-24 | Monkey   | Brazil | MG     | MH484427 Brazil MG Monkey 2017-01-24    |
| MH484428 | 2017-02-05 | Human    | Brazil | MG     | MH484428 Brazil MG Human 2017-02-05     |
| MH484429 | 2017-02-03 | Monkey   | Brazil | MG     | MH484429 Brazil MG Monkey 2017-02-03    |
| MH484430 | 2017-02-09 | Monkey   | Brazil | MG     | MH484430 Brazil MG Monkey 2017-02-09    |
| MH484431 | 2017-02-14 | Monkey   | Brazil | MG     | MH484431 Brazil MG Monkey 2017-02-14    |
| MH484432 | 2017-01-23 | Monkey   | Brazil | MG     | MH484432 Brazil MG Monkey 2017-01-23    |
| MH484433 | 2017-02-03 | Monkey   | Brazil | MG     | MH484433 Brazil MG Monkey 2017-02-03    |
| MH484434 | 2017-01-22 | Human    | Brazil | MG     | MH484434 Brazil MG Human 2017-01-22     |
| MH560359 | 2017-01-15 | Human    | Brazil | MG     | MH560359 Brazil MG Human 2017-01-15     |
| MH666056 | 2016-11-16 | Monkey   | Brazil | SP     | MH666056 Brazil SP Monkey 2016-11-16    |
| MH666057 | 2017-01-23 | Monkey   | Brazil | SP     | MH666057 Brazil SP Monkey 2017-01-23    |
| MH666058 | 2016-12-19 | Monkey   | Brazil | SP     | MH666058 Brazil SP Monkey 2016-12-19    |
| MH666059 | 2017-01-15 | Mosquito | Brazil | SP     | MH666059 Brazil SP Mosquito 2017-01-15  |
| MH666060 | 2017-01-15 | Mosquito | Brazil | SP     | MH666060 Brazil SP Mosquito 2017-01-15  |
| MK089775 | 2017-03-06 | Mosquito | Brazil | RJ     | MK089775 Brazil RJ Mosquito 2017-03-06  |
| MK249065 | 2017-02-15 | Human    | Brazil | MG     | MK249065 Brazil MG Human 2017-02-15     |
| MK249066 | 2018-01-15 | Monkey   | Brazil | MG     | MK249066 Brazil MG Monkey 2018-01-15    |
| MK333798 | 2018-01-08 | Human    | Brazil | SP     | MK333798 Brazil SP Human 2018-01-08     |
| MK333799 | 2018-01-08 | Human    | Brazil | SP     | MK333799 Brazil SP Human 2018-01-08     |
| MK333800 | 2017-02-20 | Monkey   | Brazil | ES     | MK333800 Brazil ES Monkey 2017-02-20    |
| MK333801 | 2017-04-05 | Mosquito | Brazil | ES     | MK333801 Brazil ES Mosquito 2017-04-05  |
| MK333802 | 2017-04-05 | Mosquito | Brazil | ES     | MK333802 Brazil ES Mosquito 2017-04-05  |
| MK333803 | 2017-04-20 | Monkey   | Brazil | GO     | MK333803 Brazil GO Monkey 2017-04-20    |
| MK333804 | 2015-08-17 | Monkey   | Brazil | GO     | MK333804 Brazil GO Monkey 2015-08-17    |
| MK333805 | 2018-02-07 | Mosquito | Brazil | RJ     | MK333805 Brazil RJ Mosquito 2018-02-07  |
| MK333806 | 2018-01-27 | Mosquito | Brazil | MG     | MK333806 Brazil MG Mosquito 2018-01-27  |
| MK333807 | 2018-01-18 | Mosquito | Brazil | MG     | MK333807 Brazil MG Mosquito 2018-01-18  |
| MK333808 | 2018-01-29 | Mosquito | Brazil | MG     | MK333808 Brazil MG Mosquito 2018-01-29  |
| MK333809 | 2018-01-19 | Mosquito | Brazil | RJ     | MK333809 Brazil RJ Mosquito 2018-01-19  |

|          |            |          |             |                 |                                                   |
|----------|------------|----------|-------------|-----------------|---------------------------------------------------|
| MK533792 | 2019-01-10 | Monkey   | Brazil      | RJ              | MK533792 Brazil RJ Monkey 2019-01-10              |
| MK728873 | 2017-03-04 | Human    | Brazil      | GO              | MK728873 Brazil GO Human 2017-03-04               |
| MK760660 | 2018-01-11 | Human    | Netherlands | TravelledBrazil | MK760660 Netherlands TraveBrazil Human 2018-01-11 |
| MK760661 | 2018-01-11 | Human    | Netherlands | TravelledBrazil | MK760661 Netherlands TraveBrazil Human 2018-01-11 |
| MK760662 | 2018-01-12 | Human    | Netherlands | TravelledBrazil | MK760662 Netherlands TraveBrazil Human 2018-01-12 |
| MK760663 | 2018-01-13 | Human    | Netherlands | TravelledBrazil | MK760663 Netherlands TraveBrazil Human 2018-01-13 |
| MK760664 | 2018-01-14 | Human    | Netherlands | TravelledBrazil | MK760664 Netherlands TraveBrazil Human 2018-01-14 |
| MK760665 | 2018-01-19 | Human    | Netherlands | TravelledBrazil | MK760665 Netherlands TraveBrazil Human 2018-01-19 |
| MK760666 | 2018-01-12 | Human    | Netherlands | TravelledBrazil | MK760666 Netherlands TraveBrazil Human 2018-01-12 |
| MK882599 | 2017-02-09 | Human    | Brazil      | ES              | MK882599 Brazil ES Human 2017-02-09               |
| MK882600 | 2018-04-24 | Human    | Brazil      | RJ              | MK882600 Brazil RJ Human 2018-04-24               |
| MK882601 | 2017-01-24 | Human    | Brazil      | ES              | MK882601 Brazil ES Human 2017-01-24               |
| MK882602 | 2017-01-31 | Human    | Brazil      | ES              | MK882602 Brazil ES Human 2017-01-31               |
| MK882603 | 2018-04-24 | Human    | Brazil      | RJ              | MK882603 Brazil RJ Human 2018-04-24               |
| MK882604 | 2017-02-16 | Human    | Brazil      | ES              | MK882604 Brazil ES Human 2017-02-16               |
| MK882605 | 2017-03-09 | Human    | Brazil      | RJ              | MK882605 Brazil RJ Human 2017-03-09               |
| MK882606 | 2017-03-07 | Human    | Brazil      | RJ              | MK882606 Brazil RJ Human 2017-03-07               |
| MK882607 | 2017-03-09 | Human    | Brazil      | RJ              | MK882607 Brazil RJ Human 2017-03-09               |
| MK882608 | 2017-03-12 | Human    | Brazil      | RJ              | MK882608 Brazil RJ Human 2017-03-12               |
| MK882609 | 2017-03-13 | Human    | Brazil      | ES              | MK882609 Brazil ES Human 2017-03-13               |
| MK882610 | 2017-03-06 | Human    | Brazil      | ES              | MK882610 Brazil ES Human 2017-03-06               |
| MK882611 | 2017-03-08 | Human    | Brazil      | ES              | MK882611 Brazil ES Human 2017-03-08               |
| MK882612 | 2017-03-20 | Human    | Brazil      | ES              | MK882612 Brazil ES Human 2017-03-20               |
| MK882613 | 2017-03-27 | Human    | Brazil      | RJ              | MK882613 Brazil RJ Human 2017-03-27               |
| MK882614 | 2017-04-17 | Human    | Brazil      | RJ              | MK882614 Brazil RJ Human 2017-04-17               |
| MK882615 | 2017-03-27 | Human    | Brazil      | RJ              | MK882615 Brazil RJ Human 2017-03-27               |
| MK882616 | 2017-04-17 | Human    | Brazil      | RJ              | MK882616 Brazil RJ Human 2017-04-17               |
| MK882617 | 2017-11-28 | Human    | Brazil      | RJ              | MK882617 Brazil RJ Human 2017-11-28               |
| MK882618 | 2018-01-22 | Human    | Brazil      | RJ              | MK882618 Brazil RJ Human 2018-01-22               |
| MK882619 | 2018-01-25 | Human    | Brazil      | RJ              | MK882619 Brazil RJ Human 2018-01-25               |
| MK882621 | 2018-02-05 | Human    | Brazil      | RJ              | MK882621 Brazil RJ Human 2018-02-05               |
| MN117917 | 2017-02-15 | Mosquito | Brazil      | SP              | MN117917 Brazil SP Mosquito 2017-02-15            |
| MN604280 | 2017-03-10 | Monkey   | Brazil      | BA              | MN604280 Brazil BA Monkey 2017-03-10              |
| MN604281 | 2017-03-13 | Monkey   | Brazil      | BA              | MN604281 Brazil BA Monkey 2017-03-13              |



|          |            |        |        |    |                                      |
|----------|------------|--------|--------|----|--------------------------------------|
| MN604282 | 2017-03-16 | Monkey | Brazil | BA | MN604282 Brazil BA Monkey 2017-03-16 |
| MN604283 | 2017-03-15 | Monkey | Brazil | BA | MN604283 Brazil BA Monkey 2017-03-15 |
| MN604284 | 2017-03-15 | Human  | Brazil | BA | MN604284 Brazil BA Human 2017-03-15  |
| MN604285 | 2017-04-05 | Monkey | Brazil | BA | MN604285 Brazil BA Monkey 2017-04-05 |
| MN604286 | 2017-04-07 | Monkey | Brazil | BA | MN604286 Brazil BA Monkey 2017-04-07 |
| MN604287 | 2017-03-17 | Monkey | Brazil | BA | MN604287 Brazil BA Monkey 2017-03-17 |
| MN643077 | 2018-01-16 | Human  | Brazil | RJ | MN643077 Brazil RJ Human 2018-01-16  |
| MN643078 | 2018-01-25 | Human  | Brazil | RJ | MN643078 Brazil RJ Human 2018-01-25  |
| MN643079 | 2018-01-26 | Human  | Brazil | RJ | MN643079 Brazil RJ Human 2018-01-26  |
| MN643080 | 2018-02-17 | Human  | Brazil | RJ | MN643080 Brazil RJ Human 2018-02-17  |
| MN643081 | 2018-02-19 | Human  | Brazil | RJ | MN643081 Brazil RJ Human 2018-02-19  |
| MN643082 | 2018-02-16 | Human  | Brazil | RJ | MN643082 Brazil RJ Human 2018-02-16  |
| MN643083 | 2018-02-25 | Human  | Brazil | RJ | MN643083 Brazil RJ Human 2018-02-25  |
| MN643084 | 2018-02-25 | Human  | Brazil | RJ | MN643084 Brazil RJ Human 2018-02-25  |
| MN643085 | 2018-02-11 | Human  | Brazil | RJ | MN643085 Brazil RJ Human 2018-02-11  |
| MN643086 | 2018-02-14 | Human  | Brazil | RJ | MN643086 Brazil RJ Human 2018-02-14  |
| MN643087 | 2018-02-13 | Human  | Brazil | RJ | MN643087 Brazil RJ Human 2018-02-13  |
| MN643088 | 2017-04-19 | Monkey | Brazil | RJ | MN643088 Brazil RJ Monkey 2017-04-19 |
| MN643089 | 2017-10-19 | Monkey | Brazil | RJ | MN643089 Brazil RJ Monkey 2017-10-19 |
| MN643090 | 2018-02-04 | Monkey | Brazil | RJ | MN643090 Brazil RJ Monkey 2018-02-04 |
| MN643091 | 2018-02-07 | Monkey | Brazil | RJ | MN643091 Brazil RJ Monkey 2018-02-07 |
| MN643092 | 2018-02-07 | Monkey | Brazil | RJ | MN643092 Brazil RJ Monkey 2018-02-07 |
| MN737509 | 2019-11-21 |        | Brazil |    | MN737509 Brazil   2019-11-21         |
| MT497520 | 2016-10-10 | Monkey | Brazil | SP | MT497520 Brazil SP Monkey 2016-10-10 |
| MT497521 | 2016-10-13 | Monkey | Brazil | SP | MT497521 Brazil SP Monkey 2016-10-13 |
| MT497522 | 2016-11-15 | Monkey | Brazil | SP | MT497522 Brazil SP Monkey 2016-11-15 |
| MT497523 | 2016-11-16 | Monkey | Brazil | SP | MT497523 Brazil SP Monkey 2016-11-16 |
| MT497524 | 2016-12-12 | Monkey | Brazil | SP | MT497524 Brazil SP Monkey 2016-12-12 |
| MT497525 | 2017-01-21 | Monkey | Brazil | SP | MT497525 Brazil SP Monkey 2017-01-21 |
| MW034590 | 2016-11-01 | Monkey | Brazil | SP | MW034590 Brazil SP Monkey 2016-11-01 |
| MW158338 | 1955-01-21 | Monkey | Brazil |    | MW158338 Brazil  Monkey 1955-01-21   |
| MW158339 | 1960-09-23 | Monkey | Brazil |    | MW158339 Brazil  Monkey 1960-09-23   |
| MW158340 | 1968-06-06 | Monkey | Brazil |    | MW158340 Brazil  Monkey 1968-06-06   |
| MW158341 | 1991-06-21 | Monkey | Brazil |    | MW158341 Brazil  Monkey 1991-06-21   |

|          |            |          |               |                     |                                                   |
|----------|------------|----------|---------------|---------------------|---------------------------------------------------|
| MW158342 | 2000-02-07 | Monkey   |               | Brazil              | MW158342 Brazil  Monkey 2000-02-07                |
| MW158343 | 1973-02-16 | Mosquito |               | Brazil              | MW158343 Brazil  Mosquito 1973-02-16              |
| MW158344 | 1985-06-16 | Mosquito |               | Brazil              | MW158344 Brazil  Mosquito 1985-06-16              |
| MW158345 | 1988-12-14 | Mosquito |               | Trinidad and Tobago | MW158345 Trinidad and Tobago  Mosquito 1988-12-14 |
| MW158346 | 1989-01-20 | Mosquito |               | Trinidad and Tobago | MW158346 Trinidad and Tobago  Mosquito 1989-01-20 |
| MW158347 | 1989-02-22 | Monkey   |               | Trinidad and Tobago | MW158347 Trinidad and Tobago  Monkey 1989-02-22   |
| MW158348 | 1995-XX-XX | Mosquito |               | Trinidad and Tobago | MW158348 Trinidad and Tobago  Mosquito 1995-XX-XX |
| MW158349 | 2004-XX-XX | Monkey   |               | Venezuela           | MW158349 Venezuela  Monkey 2004-XX-XX             |
| MW158350 | 2004-XX-XX | Monkey   |               | Venezuela           | MW158350 Venezuela  Monkey 2004-XX-XX             |
| MW158351 | 2005-XX-XX | Monkey   |               | Venezuela           | MW158351 Venezuela  Monkey 2005-XX-XX             |
| MW158352 | 2005-XX-XX | Monkey   |               | Venezuela           | MW158352 Venezuela  Monkey 2005-XX-XX             |
| MW158353 | 2005-XX-XX | Human    |               | Venezuela           | MW158353 Venezuela  Human 2005-XX-XX              |
| MW158354 | 2005-XX-XX | Human    |               | Venezuela           | MW158354 Venezuela  Human 2005-XX-XX              |
| MW158355 | 2006-XX-XX | Monkey   |               | Venezuela           | MW158355 Venezuela  Monkey 2006-XX-XX             |
| MW158356 | 2007-XX-XX | Monkey   |               | Venezuela           | MW158356 Venezuela  Monkey 2007-XX-XX             |
| MW158357 | 2010-XX-XX | Monkey   |               | Venezuela           | MW158357 Venezuela  Monkey 2010-XX-XX             |
| MW158358 | 2004-XX-XX | Human    |               | Peru                | MW158358 Peru  Human 2004-XX-XX                   |
| MW158359 | 1998-01-20 | Human    |               | Peru                | MW158359 Peru  Human 1998-01-20                   |
| MW158360 | 2011-03-XX | Human    |               | Peru                | MW158360 Peru  Human 2011-03-XX                   |
| MW158361 | 1995-05-19 | Human    |               | Peru                | MW158361 Peru  Human 1995-05-19                   |
| MW158362 | 1997-07-XX | Human    |               | Ecuador             | MW158362 Ecuador  Human 1997-07-XX                |
| MW158363 | 1966-XX-XX | Human    |               | USA                 | MW158363 USA  Human 1966-XX-XX                    |
| MW158364 | 2009-01-22 | Mosquito |               | Trinidad and Tobago | MW158364 Trinidad and Tobago  Mosquito 2009-01-22 |
| MW158365 | 2008-12-05 | Mosquito |               | Trinidad and Tobago | MW158365 Trinidad and Tobago  Mosquito 2008-12-05 |
| MW158366 | 2009-01-16 | Mosquito |               | Trinidad and Tobago | MW158366 Trinidad and Tobago  Mosquito 2009-01-16 |
| MW158367 | 2009-01-16 | Mosquito |               | Trinidad and Tobago | MW158367 Trinidad and Tobago  Mosquito 2009-01-16 |
| MW249074 | 2019-02-07 | Human    | 7D_P3         | France              | MW249074 France  Human 2019-02-07                 |
| MW249075 | 2019-02-07 | Human    | 17D_P4        | France              | MW249075 France  Human 2019-02-07                 |
| MW249076 | 2019-02-07 | Human    | 17D_P5        | France              | MW249076 France  Human 2019-02-07                 |
| MW249077 | 2019-02-07 | Human    | FNV_P3        | France              | MW249077 France  Human 2019-02-07                 |
| MW249078 | 2019-02-07 | Human    | FNV_P4        | France              | MW249078 France  Human 2019-02-07                 |
| MW249079 | 2019-02-07 | Human    | FNV_P5        | France              | MW249079 France  Human 2019-02-07                 |
| MW249080 | 2019-02-07 | Human    | Stamaril_2002 | France              | MW249080 France  Human 2019-02-07                 |
| MW249081 | 2019-02-07 | Human    | FNV-NS1       | France              | MW249081 France  Human 2019-02-07                 |



|          |            |          |           |         |    |                                       |
|----------|------------|----------|-----------|---------|----|---------------------------------------|
| MW249082 | 2019-02-07 | Human    | FNV-N2    | France  |    | MW249082 France  Human 2019-02-07     |
| MW249083 | 2019-02-07 | Human    | FNV-N3    | France  |    | MW249083 France  Human 2019-02-07     |
| MW249084 | 2019-02-07 | Human    | FNV-NS4   | France  |    | MW249084 France  Human 2019-02-07     |
| MW249085 | 2019-02-07 | Human    | FNV-S5    | France  |    | MW249085 France  Human 2019-02-07     |
| MW249086 | 2019-02-07 | Human    | FNV-N6    | France  |    | MW249086 France  Human 2019-02-07     |
| MW249087 | 2019-02-07 | Human    | FNV-S7    | France  |    | MW249087 France  Human 2019-02-07     |
| MW249088 | 2019-02-07 | Human    | FNV-S8    | France  |    | MW249088 France  Human 2019-02-07     |
| MW249089 | 2019-02-07 | Human    | FNV-NS9   | France  |    | MW249089 France  Human 2019-02-07     |
| MW249090 | 2019-02-07 | Human    | FNV-NS10  | France  |    | MW249090 France  Human 2019-02-07     |
| MW249091 | 2019-02-07 | Human    | FNV-S11   | France  |    | MW249091 France  Human 2019-02-07     |
| MW249092 | 2019-02-07 | Human    | FNV-NS13  | France  |    | MW249092 France  Human 2019-02-07     |
| MW249093 | 2019-02-07 | Human    | FNV-N14   | France  |    | MW249093 France  Human 2019-02-07     |
| MW249094 | 2019-02-07 | Human    | FNV-NS15  | France  |    | MW249094 France  Human 2019-02-07     |
| MW249095 | 2019-02-07 | Human    | FNV-N12   | France  |    | MW249095 France  Human 2019-02-07     |
| MW308134 | 2018-10-26 | Human    | YFV084FIG | Brazil  | SP | MW308134 Brazil SP Human 2018-10-26   |
| MW308135 | 2019-01-20 | Human    | YFV085FIG | Brazil  | SP | MW308135 Brazil SP Human 2019-01-20   |
| MZ285906 | 1927-XX-XX | Human    |           | Senegal |    | MZ285906 Senegal  Human 1927-XX-XX    |
| MZ595182 | 2020-XX-XX | Mosquito | PM322117  | Senegal |    | MZ595182 Senegal  Mosquito 2020-XX-XX |
| MZ595183 | 2020-XX-XX | Mosquito | PM322188  | Senegal |    | MZ595183 Senegal  Mosquito 2020-XX-XX |
| MZ595184 | 2020-XX-XX | Mosquito | PM352481  | Senegal |    | MZ595184 Senegal  Mosquito 2020-XX-XX |
| MZ595185 | 2020-XX-XX | Mosquito | PM352628  | Senegal |    | MZ595185 Senegal  Mosquito 2020-XX-XX |
| MZ595186 | 2020-XX-XX | Mosquito | PM352640  | Senegal |    | MZ595186 Senegal  Mosquito 2020-XX-XX |
| MZ595187 | 2020-XX-XX | Mosquito | PM352649  | Senegal |    | MZ595187 Senegal  Mosquito 2020-XX-XX |
| MZ595188 | 2020-XX-XX | Mosquito | PM352652  | Senegal |    | MZ595188 Senegal  Mosquito 2020-XX-XX |
| MZ595189 | 2020-XX-XX | Mosquito | PM352662  | Senegal |    | MZ595189 Senegal  Mosquito 2020-XX-XX |
| MZ595190 | 2020-XX-XX | Mosquito | PM352721  | Senegal |    | MZ595190 Senegal  Mosquito 2020-XX-XX |
| MZ595191 | 2020-XX-XX | Mosquito | PM352818  | Senegal |    | MZ595191 Senegal  Mosquito 2020-XX-XX |
| MZ595192 | 2020-XX-XX | Mosquito | PM352820  | Senegal |    | MZ595192 Senegal  Mosquito 2020-XX-XX |
| MZ595193 | 2020-XX-XX | Mosquito | PM352859  | Senegal |    | MZ595193 Senegal  Mosquito 2020-XX-XX |
| MZ595194 | 2020-XX-XX | Mosquito | PM352903  | Senegal |    | MZ595194 Senegal  Mosquito 2020-XX-XX |
| MZ595195 | 2020-XX-XX | Mosquito | PM352943  | Senegal |    | MZ595195 Senegal  Mosquito 2020-XX-XX |
| MZ595196 | 2020-XX-XX | Mosquito | PM352951  | Senegal |    | MZ595196 Senegal  Mosquito 2020-XX-XX |
| MZ595197 | 2020-XX-XX | Mosquito | PM352972  | Senegal |    | MZ595197 Senegal  Mosquito 2020-XX-XX |
| MZ595198 | 2020-XX-XX | Mosquito | PM353136  | Senegal |    | MZ595198 Senegal  Mosquito 2020-XX-XX |

|          |            |          |          |         |                                       |
|----------|------------|----------|----------|---------|---------------------------------------|
| MZ595199 | 2020-XX-XX | Mosquito | PM353171 | Senegal | MZ595199 Senegal  Mosquito 2020-XX-XX |
| MZ595203 | 2020-XX-XX | Human    | SH329086 | Senegal | MZ595203 Senegal  Human 2020-XX-XX    |
| MZ604838 | 2019-XX-XX | Human    |          | Brazil  | MZ604838 Brazil  Human 2019-XX-XX     |
| MZ604839 | 2019-XX-XX | Human    |          | Brazil  | MZ604839 Brazil  Human 2019-XX-XX     |
| MZ604840 | 2018-XX-XX | Human    |          | Brazil  | MZ604840 Brazil  Human 2018-XX-XX     |
| MZ604841 | 2019-XX-XX | Human    |          | Brazil  | MZ604841 Brazil  Human 2019-XX-XX     |
| MZ604842 | 2018-XX-XX | Human    |          | Brazil  | MZ604842 Brazil  Human 2018-XX-XX     |
| MZ604843 | 2019-XX-XX | Human    |          | Brazil  | MZ604843 Brazil  Human 2019-XX-XX     |
| MZ604844 | 2019-XX-XX | Human    |          | Brazil  | MZ604844 Brazil  Human 2019-XX-XX     |
| MZ604845 | 2018-XX-XX | Human    |          | Brazil  | MZ604845 Brazil  Human 2018-XX-XX     |
| MZ604846 | 2019-XX-XX | Human    |          | Brazil  | MZ604846 Brazil  Human 2019-XX-XX     |
| MZ604847 | 2019-XX-XX | Human    |          | Brazil  | MZ604847 Brazil  Human 2019-XX-XX     |
| MZ604848 | 2019-XX-XX | Human    |          | Brazil  | MZ604848 Brazil  Human 2019-XX-XX     |
| MZ604849 | 2019-XX-XX | Human    |          | Brazil  | MZ604849 Brazil  Human 2019-XX-XX     |
| MZ604850 | 2019-XX-XX | Human    |          | Brazil  | MZ604850 Brazil  Human 2019-XX-XX     |
| MZ604851 | 2019-XX-XX | Human    |          | Brazil  | MZ604851 Brazil  Human 2019-XX-XX     |
| MZ604852 | 2019-XX-XX | Human    |          | Brazil  | MZ604852 Brazil  Human 2019-XX-XX     |
| MZ604853 | 2019-XX-XX | Human    |          | Brazil  | MZ604853 Brazil  Human 2019-XX-XX     |
| MZ604854 | 2019-XX-XX | Human    |          | Brazil  | MZ604854 Brazil  Human 2019-XX-XX     |
| MZ604855 | 2019-XX-XX | Human    |          | Brazil  | MZ604855 Brazil  Human 2019-XX-XX     |
| MZ604856 | 2018-XX-XX | Human    |          | Brazil  | MZ604856 Brazil  Human 2018-XX-XX     |
| MZ604857 | 2019-XX-XX | Human    |          | Brazil  | MZ604857 Brazil  Human 2019-XX-XX     |
| MZ604858 | 2019-XX-XX | Human    |          | Brazil  | MZ604858 Brazil  Human 2019-XX-XX     |
| MZ604859 | 2018-XX-XX | Human    |          | Brazil  | MZ604859 Brazil  Human 2018-XX-XX     |
| MZ604860 | 2019-XX-XX | Human    |          | Brazil  | MZ604860 Brazil  Human 2019-XX-XX     |
| MZ604861 | 2018-XX-XX | Human    |          | Brazil  | MZ604861 Brazil  Human 2018-XX-XX     |
| MZ604862 | 2018-XX-XX | Human    |          | Brazil  | MZ604862 Brazil  Human 2018-XX-XX     |
| MZ604863 | 2019-XX-XX | Human    |          | Brazil  | MZ604863 Brazil  Human 2019-XX-XX     |
| MZ604864 | 2019-XX-XX | Human    |          | Brazil  | MZ604864 Brazil  Human 2019-XX-XX     |
| MZ604865 | 2018-XX-XX | Human    |          | Brazil  | MZ604865 Brazil  Human 2018-XX-XX     |
| MZ604866 | 2018-XX-XX | Human    |          | Brazil  | MZ604866 Brazil  Human 2018-XX-XX     |
| MZ604867 | 2019-XX-XX | Human    |          | Brazil  | MZ604867 Brazil  Human 2019-XX-XX     |
| MZ604868 | 2018-XX-XX | Human    |          | Brazil  | MZ604868 Brazil  Human 2018-XX-XX     |
| MZ604869 | 2019-XX-XX | Human    |          | Brazil  | MZ604869 Brazil  Human 2019-XX-XX     |



|          |            |        |                            |        |    |                                      |
|----------|------------|--------|----------------------------|--------|----|--------------------------------------|
| MZ604870 | 2018-XX-XX | Human  |                            | Brazil |    | MZ604870 Brazil  Human 2018-XX-XX    |
| MZ604871 | 2019-XX-XX | Human  |                            | Brazil |    | MZ604871 Brazil  Human 2019-XX-XX    |
| MZ604872 | 2018-XX-XX | Human  |                            | Brazil |    | MZ604872 Brazil  Human 2018-XX-XX    |
| MZ604873 | 2018-XX-XX | Human  |                            | Brazil |    | MZ604873 Brazil  Human 2018-XX-XX    |
| MZ604874 | 2019-XX-XX | Human  |                            | Brazil |    | MZ604874 Brazil  Human 2019-XX-XX    |
| MZ604875 | 2019-XX-XX | Human  |                            | Brazil |    | MZ604875 Brazil  Human 2019-XX-XX    |
| MZ604876 | 2018-XX-XX | Human  |                            | Brazil |    | MZ604876 Brazil  Human 2018-XX-XX    |
| MZ712127 | 2021-03-04 | Monkey | Andre_da_Rocha_02          | Brazil | RS | MZ712127 Brazil RS Monkey 2021-03-04 |
| MZ712128 | 2021-02-22 | Monkey | Barracao_02                | Brazil | RS | MZ712128 Brazil RS Monkey 2021-02-22 |
| MZ712129 | 2021-02-22 | Monkey | Barracao_03                | Brazil | RS | MZ712129 Brazil RS Monkey 2021-02-22 |
| MZ712130 | 2021-02-22 | Monkey | Barracao_04                | Brazil |    | MZ712130 Brazil  Monkey 2021-02-22   |
| MZ712131 | 2021-02-19 | Monkey | Esmeralda_01               | Brazil | RS | MZ712131 Brazil RS Monkey 2021-02-19 |
| MZ712132 | 2021-02-24 | Monkey | Esmeralda_02               | Brazil | RS | MZ712132 Brazil RS Monkey 2021-02-24 |
| MZ712133 | 2021-02-25 | Monkey | Esmeralda_03               | Brazil | RS | MZ712133 Brazil RS Monkey 2021-02-25 |
| MZ712134 | 2021-02-25 | Monkey | Esmeralda_04               | Brazil | RS | MZ712134 Brazil RS Monkey 2021-02-25 |
| MZ712135 | 2021-03-08 | Monkey | Ipe_01                     | Brazil | RS | MZ712135 Brazil RS Monkey 2021-03-08 |
| MZ712136 | 2021-02-08 | Monkey | Monte_Alegre_dos_Campos_01 | Brazil | RS | MZ712136 Brazil RS Monkey 2021-02-08 |
| MZ712137 | 2021-02-26 | Monkey | Monte_Alegre_dos_Campos_02 | Brazil | RS | MZ712137 Brazil RS Monkey 2021-02-26 |
| MZ712138 | 2021-03-03 | Monkey | Monte_Alegre_dos_Campos_03 | Brazil | RS | MZ712138 Brazil RS Monkey 2021-03-03 |
| MZ712139 | 2021-02-20 | Monkey | Muitos_Capoes_01           | Brazil | RS | MZ712139 Brazil RS Monkey 2021-02-20 |
| MZ712140 | 2021-01-25 | Monkey | Pinhal_da_Serra_01         | Brazil | RS | MZ712140 Brazil RS Monkey 2021-01-25 |
| MZ712141 | 2021-02-03 | Monkey | Pinhal_da_Serra_02         | Brazil | RS | MZ712141 Brazil RS Monkey 2021-02-03 |
| MZ712142 | 2021-02-03 | Monkey | Pinhal_da_Serra_03         | Brazil | RS | MZ712142 Brazil RS Monkey 2021-02-03 |
| MZ712143 | 2021-02-08 | Monkey | Pinhal_da_Serra_05         | Brazil | RS | MZ712143 Brazil RS Monkey 2021-02-08 |
| MZ712144 | 2021-02-11 | Monkey | Pinhal_da_Serra_07         | Brazil | RS | MZ712144 Brazil RS Monkey 2021-02-11 |
| MZ712145 | 2021-02-19 | Monkey | Pinhal_da_Serra_08         | Brazil | RS | MZ712145 Brazil RS Monkey 2021-02-19 |
| MZ712146 | 2021-02-19 | Monkey | Pinhal_da_Serra_09         | Brazil | RS | MZ712146 Brazil RS Monkey 2021-02-19 |
| MZ712147 | 2021-02-22 | Monkey | Vacaria_01                 | Brazil | RS | MZ712147 Brazil RS Monkey 2021-02-22 |
| MZ712148 | 2021-02-22 | Monkey | Vacaria_02                 | Brazil | RS | MZ712148 Brazil RS Monkey 2021-02-22 |
| MZ712149 | 2021-02-24 | Monkey | Vacaria_04                 | Brazil | RS | MZ712149 Brazil RS Monkey 2021-02-24 |
| OL519587 | 2021-08-25 | Monkey | MG66-L                     | Brazil | MG | OL519587 Brazil MG Monkey 2021-08-25 |
| OL519588 | 2021-08-25 | Monkey | MG66-S                     | Brazil | MG | OL519588 Brazil MG Monkey 2021-08-25 |
| OL519589 | 2021-08-25 | Monkey | MG66-k                     | Brazil | MG | OL519589 Brazil MG Monkey 2021-08-25 |
| OM066735 | 2021-10-26 | Human  |                            | Ghana  |    | OM066735 Ghana  Human 2021-10-26     |

|          |            |              |                       |        |    |                                          |
|----------|------------|--------------|-----------------------|--------|----|------------------------------------------|
| OM066736 | 2021-11-04 | Human        |                       | Ghana  |    | OM066736 Ghana  Human 2021-11-04         |
| OM066737 | 2021-11-04 | Human        |                       | Ghana  |    | OM066737 Ghana  Human 2021-11-04         |
| OM938988 | 2016-XX-XX | Cell_culture | MSLFDV02508           | France |    | OM938988 France  Cell_culture 2016-XX-XX |
| OM938989 | 2018-XX-XX | Cell_culture | DSFDV02794            | France |    | OM938989 France  Cell_culture 2018-XX-XX |
| OM938990 | 2019-XX-XX | Cell_culture | DSFDV02926            | France |    | OM938990 France  Cell_culture 2019-XX-XX |
| ON022238 | 2017-01-24 | Monkey       | IAL-13                | Brazil | ES | ON022238 Brazil ES Monkey 2017-01-24     |
| ON022239 | 2018-01-17 | Human        | 0158/18 FA            | Brazil | MG | ON022239 Brazil MG Human 2018-01-17      |
| ON022240 | 2018-01-05 | Monkey       | 0042/18 IV            | Brazil | MG | ON022240 Brazil MG Monkey 2018-01-05     |
| ON022241 | 2018-01-02 | Monkey       | 0053/18 IV            | Brazil | MG | ON022241 Brazil MG Monkey 2018-01-02     |
| ON022242 | 2018-01-15 | Human        | 0100/18 FA            | Brazil | MG | ON022242 Brazil MG Human 2018-01-15      |
| ON022243 | 2018-01-08 | Monkey       | 0051/18 IV            | Brazil | MG | ON022243 Brazil MG Monkey 2018-01-08     |
| ON022244 | 2018-01-17 | Human        | 0154/18 FA            | Brazil | MG | ON022244 Brazil MG Human 2018-01-17      |
| ON022245 | 2018-01-05 | Human        | 0031/18 FA            | Brazil | MG | ON022245 Brazil MG Human 2018-01-05      |
| ON022246 | 2018-01-09 | Human        | 0044/18 FA            | Brazil | MG | ON022246 Brazil MG Human 2018-01-09      |
| ON022247 | 2018-01-13 | Human        | 0071/18 FA            | Brazil | MG | ON022247 Brazil MG Human 2018-01-13      |
| ON022248 | 2018-01-15 | Human        | 0107/18 FA            | Brazil | MG | ON022248 Brazil MG Human 2018-01-15      |
| ON022249 | 2018-01-16 | Human        | 0129/18 FA            | Brazil | MG | ON022249 Brazil MG Human 2018-01-16      |
| ON022250 | 2018-01-16 | Human        | 0136/18 FA_vaccinated | Brazil | MG | ON022250 Brazil MG Human 2018-01-16      |
| ON022251 | 2018-01-05 | Monkey       | 0048/18 IV            | Brazil | MG | ON022251 Brazil MG Monkey 2018-01-05     |
| ON022252 | 2018-01-01 | Monkey       | 0047/18 IV            | Brazil | MG | ON022252 Brazil MG Monkey 2018-01-01     |
| ON022253 | 2018-01-17 | Human        | 0163/18 FA_vaccinated | Brazil | MG | ON022253 Brazil MG Human 2018-01-17      |
| ON022254 | 2018-01-04 | Monkey       | 0045/18 IV            | Brazil | MG | ON022254 Brazil MG Monkey 2018-01-04     |
| ON022255 | 2018-01-15 | Human        | 0092/18 FA            | Brazil | MG | ON022255 Brazil MG Human 2018-01-15      |
| ON022256 | 2018-01-13 | Human        | 0091/18 FA            | Brazil | MG | ON022256 Brazil MG Human 2018-01-13      |
| ON022257 | 2018-01-08 | Human        | 0025/18 FA            | Brazil | MG | ON022257 Brazil MG Human 2018-01-08      |
| ON022258 | 2017-12-30 | Monkey       | 0043/18 IV            | Brazil | MG | ON022258 Brazil MG Monkey 2017-12-30     |
| ON022259 | 2018-01-02 | Monkey       | 0049/18 IV            | Brazil | MG | ON022259 Brazil MG Monkey 2018-01-02     |
| ON022260 | 2018-01-14 | Human        | 0068/18 FA            | Brazil | MG | ON022260 Brazil MG Human 2018-01-14      |
| ON022262 | 2018-01-06 | Monkey       | 0046/18 IV            | Brazil | MG | ON022262 Brazil MG Monkey 2018-01-06     |
| ON022263 | 2018-01-10 | Human        | 0043/18 FA            | Brazil | MG | ON022263 Brazil MG Human 2018-01-10      |
| ON022264 | 2017-12-18 | Monkey       | 0007/18 IV            | Brazil | MG | ON022264 Brazil MG Monkey 2017-12-18     |
| ON022265 | 2018-01-04 | Monkey       | 0055/18 IV            | Brazil | MG | ON022265 Brazil MG Monkey 2018-01-04     |
| ON022266 | 2017-12-26 | Monkey       | 0005/18 IV            | Brazil | MG | ON022266 Brazil MG Monkey 2017-12-26     |
| ON022267 | 2018-01-15 | Human        | 0109/18 FA            | Brazil | MG | ON022267 Brazil MG Human 2018-01-15      |



|          |            |          |           |       |        |    |                                        |
|----------|------------|----------|-----------|-------|--------|----|----------------------------------------|
| ON022268 | 2018-01-16 | Human    | 0299/2018 |       | Brazil | RJ | ON022268 Brazil RJ Human 2018-01-16    |
| ON022269 | 2017-11-28 | Monkey   | 7922/2017 |       | Brazil | RJ | ON022269 Brazil RJ Monkey 2017-11-28   |
| ON022270 | 2018-01-17 | Human    | 0276/2018 |       | Brazil | RJ | ON022270 Brazil RJ Human 2018-01-17    |
| ON022271 | 2018-01-16 | Human    | 0331/2018 |       | Brazil | RJ | ON022271 Brazil RJ Human 2018-01-16    |
| ON022273 | 2018-01-13 | Human    | 0227/2018 |       | Brazil | RJ | ON022273 Brazil RJ Human 2018-01-13    |
| ON022274 | 2018-01-13 | Human    | 0229/2018 |       | Brazil | RJ | ON022274 Brazil RJ Human 2018-01-13    |
| ON022275 | 2018-01-14 | Human    | 0232/2018 |       | Brazil | RJ | ON022275 Brazil RJ Human 2018-01-14    |
| ON022276 | 2018-01-15 | Human    | 0303/2018 |       | Brazil | RJ | ON022276 Brazil RJ Human 2018-01-15    |
| ON022277 | 2018-01-15 | Human    | 0306/2018 |       | Brazil | RJ | ON022277 Brazil RJ Human 2018-01-15    |
| ON022278 | 2018-01-15 | Human    | 0318/2018 |       | Brazil | RJ | ON022278 Brazil RJ Human 2018-01-15    |
| ON022280 | 2017-12-15 | Monkey   | 0023/2018 |       | Brazil | RJ | ON022280 Brazil RJ Monkey 2017-12-15   |
| ON022281 | 2017-12-22 | Monkey   | 0101/2018 |       | Brazil | RJ | ON022281 Brazil RJ Monkey 2017-12-22   |
| ON022282 | 2018-01-23 | Human    | TEC1053   |       | Brazil | RJ | ON022282 Brazil RJ Human 2018-01-23    |
| ON022283 | 2018-11-21 | Monkey   |           | 4965  | Brazil | SP | ON022283 Brazil SP Monkey 2018-11-21   |
| ON022284 | 2018-01-11 | Monkey   |           | 4950  | Brazil | SP | ON022284 Brazil SP Monkey 2018-01-11   |
| ON022285 | 2018-03-11 | Monkey   |           | 3383  | Brazil | SP | ON022285 Brazil SP Monkey 2018-03-11   |
| ON022286 | 2018-06-25 | Mosquito |           | 3766  | Brazil | SP | ON022286 Brazil SP Mosquito 2018-06-25 |
| ON022287 | 2018-07-20 | Monkey   |           | 4393  | Brazil | SP | ON022287 Brazil SP Monkey 2018-07-20   |
| ON022288 | 2016-11-16 | Monkey   | IAL-10    |       | Brazil | SP | ON022288 Brazil SP Monkey 2016-11-16   |
| ON022289 | 2018-05-23 | Mosquito |           | 3551  | Brazil | SP | ON022289 Brazil SP Mosquito 2018-05-23 |
| ON022290 | 2018-05-23 | Mosquito |           | 3552  | Brazil | SP | ON022290 Brazil SP Mosquito 2018-05-23 |
| ON022291 | 2018-05-28 | Mosquito |           | 3541  | Brazil | SP | ON022291 Brazil SP Mosquito 2018-05-28 |
| ON022292 | 2018-03-20 | Monkey   |           | 3551  | Brazil | SP | ON022292 Brazil SP Monkey 2018-03-20   |
| ON022293 | 2018-05-28 | Mosquito |           | 3530  | Brazil | SP | ON022293 Brazil SP Mosquito 2018-05-28 |
| ON022294 | 2018-05-28 | Mosquito |           | 3521  | Brazil | SP | ON022294 Brazil SP Mosquito 2018-05-28 |
| ON022295 | 2018-04-23 | Mosquito |           | 2377  | Brazil | SP | ON022295 Brazil SP Mosquito 2018-04-23 |
| ON022296 | 2018-03-02 | Monkey   |           | 3255  | Brazil | SP | ON022296 Brazil SP Monkey 2018-03-02   |
| ON022297 | 2018-01-18 | Monkey   |           | 4956  | Brazil | SP | ON022297 Brazil SP Monkey 2018-01-18   |
| ON022298 | 2018-03-23 | Human    |           | 36384 | Brazil | SP | ON022298 Brazil SP Human 2018-03-23    |
| ON022299 | 2018-03-12 | Monkey   |           | 4976  | Brazil | SP | ON022299 Brazil SP Monkey 2018-03-12   |
| ON022300 | 2016-11-03 | Mosquito | IAL-1     |       | Brazil | SP | ON022300 Brazil SP Mosquito 2016-11-03 |
| ON022301 | 2016-11-03 | Mosquito | IAL-2     |       | Brazil | SP | ON022301 Brazil SP Mosquito 2016-11-03 |
| ON022302 | 2016-11-03 | Mosquito | IAL-3     |       | Brazil | SP | ON022302 Brazil SP Mosquito 2016-11-03 |
| ON022303 | 2017-01-24 | Monkey   | IAL-6     |       | Brazil | SP | ON022303 Brazil SP Monkey 2017-01-24   |

|          |            |          |         |       |        |    |                                        |
|----------|------------|----------|---------|-------|--------|----|----------------------------------------|
| ON022304 | 2018-07-04 | Mosquito |         | 3687  | Brazil | SP | ON022304 Brazil SP Mosquito 2018-07-04 |
| ON022305 | 2018-07-04 | Mosquito |         | 3689  | Brazil | SP | ON022305 Brazil SP Mosquito 2018-07-04 |
| ON022306 | 2018-05-13 | Monkey   |         | 4086  | Brazil | SP | ON022306 Brazil SP Monkey 2018-05-13   |
| ON022307 | 2018-04-20 | Human    |         | 37071 | Brazil | SP | ON022307 Brazil SP Human 2018-04-20    |
| ON022308 | 2018-04-02 | Monkey   |         | 3587  | Brazil | SP | ON022308 Brazil SP Monkey 2018-04-02   |
| ON022309 | 2018-04-11 | Monkey   |         | 3769  | Brazil | SP | ON022309 Brazil SP Monkey 2018-04-11   |
| ON022310 | 2018-03-10 | Human    |         | 35903 | Brazil | SP | ON022310 Brazil SP Human 2018-03-10    |
| ON022311 | 2016-12-19 | Monkey   | IAL-14  |       | Brazil | SP | ON022311 Brazil SP Monkey 2016-12-19   |
| ON022312 | 2018-03-24 | Monkey   |         | 3531  | Brazil | SP | ON022312 Brazil SP Monkey 2018-03-24   |
| ON022313 | 2018-03-24 | Monkey   |         | 3538  | Brazil | SP | ON022313 Brazil SP Monkey 2018-03-24   |
| ON022314 | 2018-04-16 | Monkey   |         | 4869  | Brazil | SP | ON022314 Brazil SP Monkey 2018-04-16   |
| ON022315 | 2018-03-21 | Human    | TEC1622 |       | Brazil | SP | ON022315 Brazil SP Human 2018-03-21    |
| ON022317 | 2018-03-12 | Human    |         | 1086  | Brazil | SP | ON022317 Brazil SP Human 2018-03-12    |
| ON022318 | 2018-03-05 | Human    |         | 1079  | Brazil | SP | ON022318 Brazil SP Human 2018-03-05    |
| ON022319 | 2019-01-XX | Human    | SOFFA   |       | Brazil | SP | ON022319 Brazil SP Human 2019-01-XX    |
| ON022320 | 2018-01-08 | Monkey   |         | 2864  | Brazil | SP | ON022320 Brazil SP Monkey 2018-01-08   |
| ON022321 | 2017-12-29 | Monkey   |         | 2878  | Brazil | SP | ON022321 Brazil SP Monkey 2017-12-29   |
| ON022322 | 2018-01-07 | Monkey   |         | 2885  | Brazil | SP | ON022322 Brazil SP Monkey 2018-01-07   |
| ON022323 | 2018-01-10 | Monkey   |         | 2918  | Brazil | SP | ON022323 Brazil SP Monkey 2018-01-10   |
| ON022324 | 2018-01-22 | Monkey   |         | 2965  | Brazil | SP | ON022324 Brazil SP Monkey 2018-01-22   |
| ON022325 | 2018-01-21 | Monkey   |         | 2966  | Brazil | SP | ON022325 Brazil SP Monkey 2018-01-21   |
| ON022326 | 2018-01-19 | Monkey   |         | 2967  | Brazil | SP | ON022326 Brazil SP Monkey 2018-01-19   |
| ON022327 | 2018-01-31 | Monkey   |         | 3036  | Brazil | SP | ON022327 Brazil SP Monkey 2018-01-31   |
| ON022328 | 2018-02-22 | Monkey   |         | 3217  | Brazil | SP | ON022328 Brazil SP Monkey 2018-02-22   |
| ON022329 | 2018-01-16 | Monkey   |         | 2968  | Brazil | SP | ON022329 Brazil SP Monkey 2018-01-16   |
| ON022330 | 2018-01-19 | Monkey   |         | 2971  | Brazil | SP | ON022330 Brazil SP Monkey 2018-01-19   |
| ON022331 | 2018-01-19 | Monkey   |         | 2972  | Brazil | SP | ON022331 Brazil SP Monkey 2018-01-19   |
| ON022332 | 2018-01-19 | Monkey   |         | 2973  | Brazil | SP | ON022332 Brazil SP Monkey 2018-01-19   |
| ON022333 | 2018-01-29 | Monkey   |         | 3006  | Brazil | SP | ON022333 Brazil SP Monkey 2018-01-29   |
| ON022334 | 2018-01-31 | Monkey   |         | 3035  | Brazil | SP | ON022334 Brazil SP Monkey 2018-01-31   |
| ON022335 | 2018-01-31 | Monkey   |         | 3037  | Brazil | SP | ON022335 Brazil SP Monkey 2018-01-31   |
| ON022336 | 2018-01-29 | Monkey   |         | 3038  | Brazil | SP | ON022336 Brazil SP Monkey 2018-01-29   |
| ON022337 | 2018-02-10 | Monkey   |         | 3172  | Brazil | SP | ON022337 Brazil SP Monkey 2018-02-10   |
| ON022338 | 2018-01-21 | Monkey   |         | 3211  | Brazil | SP | ON022338 Brazil SP Monkey 2018-01-21   |

|          |            |        |            |      |        |    |                                      |
|----------|------------|--------|------------|------|--------|----|--------------------------------------|
| ON022339 | 2018-02-19 | Monkey |            | 3214 | Brazil | SP | ON022339 Brazil SP Monkey 2018-02-19 |
| ON022340 | 2018-02-15 | Monkey |            | 3216 | Brazil | SP | ON022340 Brazil SP Monkey 2018-02-15 |
| ON022341 | 2018-01-02 | Monkey |            | 2866 | Brazil | SP | ON022341 Brazil SP Monkey 2018-01-02 |
| ON022342 | 2018-01-30 | Monkey |            | 3199 | Brazil | SP | ON022342 Brazil SP Monkey 2018-01-30 |
| ON022343 | 2018-01-15 | Monkey |            | 3202 | Brazil | SP | ON022343 Brazil SP Monkey 2018-01-15 |
| ON022344 | 2018-02-01 | Monkey |            | 3223 | Brazil | SP | ON022344 Brazil SP Monkey 2018-02-01 |
| ON022345 | 2018-03-01 | Monkey |            | 3238 | Brazil | SP | ON022345 Brazil SP Monkey 2018-03-01 |
| ON022346 | 2018-01-26 | Monkey |            | 3240 | Brazil | SP | ON022346 Brazil SP Monkey 2018-01-26 |
| ON022347 | 2018-03-03 | Monkey |            | 3266 | Brazil | SP | ON022347 Brazil SP Monkey 2018-03-03 |
| ON022348 | 2018-03-13 | Monkey |            | 3382 | Brazil | SP | ON022348 Brazil SP Monkey 2018-03-13 |
| ON022349 | 2018-03-10 | Monkey |            | 3450 | Brazil | SP | ON022349 Brazil SP Monkey 2018-03-10 |
| ON022350 | 2018-03-14 | Monkey |            | 3462 | Brazil | SP | ON022350 Brazil SP Monkey 2018-03-14 |
| ON022351 | 2018-03-27 | Monkey |            | 3563 | Brazil | SP | ON022351 Brazil SP Monkey 2018-03-27 |
| ON022352 | 2018-04-18 | Monkey |            | 3773 | Brazil | SP | ON022352 Brazil SP Monkey 2018-04-18 |
| ON022353 | 2017-12-27 | Monkey |            | 2752 | Brazil | SP | ON022353 Brazil SP Monkey 2017-12-27 |
| ON022354 | 2017-12-27 | Monkey |            | 2755 | Brazil | SP | ON022354 Brazil SP Monkey 2017-12-27 |
| ON022355 | 2017-12-27 | Monkey |            | 2756 | Brazil | SP | ON022355 Brazil SP Monkey 2017-12-27 |
| ON022356 | 2017-12-27 | Monkey |            | 2757 | Brazil | SP | ON022356 Brazil SP Monkey 2017-12-27 |
| ON022357 | 2017-12-27 | Monkey |            | 2782 | Brazil | SP | ON022357 Brazil SP Monkey 2017-12-27 |
| ON022358 | 2018-01-03 | Monkey |            | 2783 | Brazil | SP | ON022358 Brazil SP Monkey 2018-01-03 |
| ON022359 | 2017-12-26 | Monkey |            | 2786 | Brazil | SP | ON022359 Brazil SP Monkey 2017-12-26 |
| ON022360 | 2018-01-02 | Monkey |            | 2868 | Brazil | SP | ON022360 Brazil SP Monkey 2018-01-02 |
| ON022361 | 2018-01-05 | Monkey |            | 2869 | Brazil | SP | ON022361 Brazil SP Monkey 2018-01-05 |
| ON022362 | 2017-12-26 | Monkey |            | 2788 | Brazil | SP | ON022362 Brazil SP Monkey 2017-12-26 |
| ON022363 | 2017-12-26 | Monkey |            | 2789 | Brazil | SP | ON022363 Brazil SP Monkey 2017-12-26 |
| ON022364 | 2017-12-29 | Monkey |            | 2862 | Brazil | SP | ON022364 Brazil SP Monkey 2017-12-29 |
| ON022365 | 2018-01-05 | Monkey |            | 2870 | Brazil | SP | ON022365 Brazil SP Monkey 2018-01-05 |
| ON022366 | 2018-01-05 | Monkey |            | 2872 | Brazil | SP | ON022366 Brazil SP Monkey 2018-01-05 |
| ON022367 | 2019-01-21 | Monkey |            | 5148 | Brazil | SP | ON022367 Brazil SP Monkey 2019-01-21 |
| ON022368 | 2019-01-15 | Monkey |            | 5159 | Brazil | SP | ON022368 Brazil SP Monkey 2019-01-15 |
| ON022369 | 2019-01-31 | Monkey |            | 5194 | Brazil | SP | ON022369 Brazil SP Monkey 2019-01-31 |
| ON022370 | 2019-02-19 | Monkey |            | 5312 | Brazil |    | ON022370 Brazil   Monkey 2019-02-19  |
| ON022371 | 2017-07-03 | Monkey | 1594/17 IV |      | Brazil | MG | ON022371 Brazil MG Monkey 2017-07-03 |
| ON022372 | 2017-11-17 | Monkey | 2014/17 IV |      | Brazil | MG | ON022372 Brazil MG Monkey 2017-11-17 |

|          |            |        |            |        |    |                                      |
|----------|------------|--------|------------|--------|----|--------------------------------------|
| ON022373 | 2017-11-18 | Monkey | 1969/17 IV | Brazil | MG | ON022373 Brazil MG Monkey 2017-11-18 |
| ON022374 | 2017-03-13 | Monkey | 0881/17 IV | Brazil | MG | ON022374 Brazil MG Monkey 2017-03-13 |
| ON022375 | 2017-02-12 | Monkey | 0407/17 IV | Brazil | MG | ON022375 Brazil MG Monkey 2017-02-12 |
| ON022376 | 2018-04-11 | Monkey | 0891/18 IV | Brazil | MG | ON022376 Brazil MG Monkey 2018-04-11 |
| ON022377 | 2018-04-17 | Monkey | 0934/18 IV | Brazil | MG | ON022377 Brazil MG Monkey 2018-04-17 |
| ON022378 | 2017-11-09 | Monkey | 1937/17 IV | Brazil | MG | ON022378 Brazil MG Monkey 2017-11-09 |
| ON022379 | 2017-05-17 | Monkey | 1351/17 IV | Brazil | MG | ON022379 Brazil MG Monkey 2017-05-17 |
| ON022380 | 2017-11-16 | Monkey | 1943/17 IV | Brazil | MG | ON022380 Brazil MG Monkey 2017-11-16 |
| ON022381 | 2017-04-06 | Monkey | 0955/17 IV | Brazil | MG | ON022381 Brazil MG Monkey 2017-04-06 |
| ON022382 | 2017-07-03 | Monkey | 1597/17 IV | Brazil | MG | ON022382 Brazil MG Monkey 2017-07-03 |
| ON022383 | 2017-04-03 | Monkey | 0843/17 IV | Brazil | MG | ON022383 Brazil MG Monkey 2017-04-03 |
| ON022384 | 2017-04-22 | Monkey | 1205/17 IV | Brazil | MG | ON022384 Brazil MG Monkey 2017-04-22 |
| ON022385 | 2017-11-24 | Monkey | 1974/17 IV | Brazil | MG | ON022385 Brazil MG Monkey 2017-11-24 |
| ON022386 | 2017-04-18 | Monkey | 1192/17 IV | Brazil | MG | ON022386 Brazil MG Monkey 2017-04-18 |
| ON022387 | 2017-12-04 | Monkey | 2043/17 IV | Brazil | MG | ON022387 Brazil MG Monkey 2017-12-04 |
| ON022388 | 2017-03-13 | Monkey | 0883/17 IV | Brazil | MG | ON022388 Brazil MG Monkey 2017-03-13 |
| ON022389 | 2017-04-12 | Monkey | 1040/17 IV | Brazil | MG | ON022389 Brazil MG Monkey 2017-04-12 |
| ON022390 | 2017-04-06 | Monkey | 0954/17 IV | Brazil | MG | ON022390 Brazil MG Monkey 2017-04-06 |
| ON022391 | 2017-11-25 | Monkey | 2009/17 IV | Brazil | MG | ON022391 Brazil MG Monkey 2017-11-25 |
| ON022392 | 2018-01-29 | Monkey | 0314/18 IV | Brazil | MG | ON022392 Brazil MG Monkey 2018-01-29 |
| ON022393 | 2017-12-05 | Monkey | 2033/17 IV | Brazil | MG | ON022393 Brazil MG Monkey 2017-12-05 |
| ON022394 | 2018-04-06 | Monkey | 0884/18 IV | Brazil | MG | ON022394 Brazil MG Monkey 2018-04-06 |
| ON022395 | 2017-03-24 | Monkey | 0817/17 IV | Brazil | MG | ON022395 Brazil MG Monkey 2017-03-24 |
| ON022396 | 2017-03-23 | Monkey | 0929/17 IV | Brazil | MG | ON022396 Brazil MG Monkey 2017-03-23 |
| ON022397 | 2017-11-20 | Monkey | 1973/17 IV | Brazil | MG | ON022397 Brazil MG Monkey 2017-11-20 |
| ON022398 | 2017-07-17 | Monkey | 1689/17 IV | Brazil | MG | ON022398 Brazil MG Monkey 2017-07-17 |
| ON022399 | 2017-03-14 | Monkey | 0872/17 IV | Brazil | MG | ON022399 Brazil MG Monkey 2017-03-14 |
| ON022401 | 2017-03-28 | Monkey | 0899/17 IV | Brazil | MG | ON022401 Brazil MG Monkey 2017-03-28 |
| ON022402 | 2017-11-07 | Monkey | 1908/17 IV | Brazil | MG | ON022402 Brazil MG Monkey 2017-11-07 |
| ON022403 | 2017-11-07 | Monkey | 1967/17 IV | Brazil | MG | ON022403 Brazil MG Monkey 2017-11-07 |
| ON022404 | 2017-11-30 | Monkey | 2000/17 IV | Brazil | MG | ON022404 Brazil MG Monkey 2017-11-30 |
| ON022405 | 2017-10-27 | Monkey | 1912/17 IV | Brazil | MG | ON022405 Brazil MG Monkey 2017-10-27 |
| ON022406 | 2017-10-25 | Monkey | 1965/17 IV | Brazil | MG | ON022406 Brazil MG Monkey 2017-10-25 |
| ON022407 | 2017-03-13 | Monkey | 0869/17 IV | Brazil | MG | ON022407 Brazil MG Monkey 2017-03-13 |



|          |            |        |            |        |    |                                      |
|----------|------------|--------|------------|--------|----|--------------------------------------|
| ON022408 | 2017-05-04 | Monkey | 1309/17 IV | Brazil | MG | ON022408 Brazil MG Monkey 2017-05-04 |
| ON022409 | 2017-04-18 | Monkey | 1209/17 IV | Brazil | MG | ON022409 Brazil MG Monkey 2017-04-18 |
| ON022410 | 2017-04-06 | Monkey | 0949/17 IV | Brazil | MG | ON022410 Brazil MG Monkey 2017-04-06 |
| ON022411 | 2017-12-05 | Monkey | 2002/17 IV | Brazil | MG | ON022411 Brazil MG Monkey 2017-12-05 |
| ON022412 | 2017-07-04 | Monkey | 1593/17 IV | Brazil | MG | ON022412 Brazil MG Monkey 2017-07-04 |
| ON022413 | 2017-11-08 | Monkey | 1942/17 IV | Brazil | MG | ON022413 Brazil MG Monkey 2017-11-08 |
| ON022414 | 2017-04-03 | Monkey | 0952/17 IV | Brazil | MG | ON022414 Brazil MG Monkey 2017-04-03 |
| ON022415 | 2017-04-03 | Monkey | 0849/17 IV | Brazil | MG | ON022415 Brazil MG Monkey 2017-04-03 |
| ON022416 | 2017-05-05 | Monkey | 1258/17 IV | Brazil | MG | ON022416 Brazil MG Monkey 2017-05-05 |
| ON022417 | 2017-10-31 | Monkey | 1938/17 IV | Brazil | MG | ON022417 Brazil MG Monkey 2017-10-31 |
| ON022418 | 2017-03-24 | Monkey | 0810/17 IV | Brazil | MG | ON022418 Brazil MG Monkey 2017-03-24 |
| ON022419 | 2017-11-05 | Monkey | 1902/17 IV | Brazil | MG | ON022419 Brazil MG Monkey 2017-11-05 |
| ON022420 | 2017-12-13 | Monkey | 2077/17 IV | Brazil | MG | ON022420 Brazil MG Monkey 2017-12-13 |
| ON022421 | 2017-04-11 | Monkey | 1204/17 IV | Brazil | MG | ON022421 Brazil MG Monkey 2017-04-11 |
| ON022422 | 2017-03-25 | Monkey | 0927/17 IV | Brazil | MG | ON022422 Brazil MG Monkey 2017-03-25 |
| ON022423 | 2017-11-29 | Monkey | 1975/17 IV | Brazil | MG | ON022423 Brazil MG Monkey 2017-11-29 |
| ON022424 | 2017-12-21 | Monkey | 2081/17 IV | Brazil | MG | ON022424 Brazil MG Monkey 2017-12-21 |
| ON022425 | 2017-10-26 | Monkey | 1911/17 IV | Brazil | MG | ON022425 Brazil MG Monkey 2017-10-26 |
| ON022426 | 2017-03-14 | Monkey | 0877/17 IV | Brazil | MG | ON022426 Brazil MG Monkey 2017-03-14 |
| ON022427 | 2017-12-03 | Monkey | 2042/17 IV | Brazil | MG | ON022427 Brazil MG Monkey 2017-12-03 |
| ON022428 | 2017-03-02 | Monkey | 0614/17 IV | Brazil | MG | ON022428 Brazil MG Monkey 2017-03-02 |
| ON022429 | 2017-04-18 | Monkey | 1193/17 IV | Brazil | MG | ON022429 Brazil MG Monkey 2017-04-18 |
| ON022430 | 2017-03-21 | Monkey | 1015/17 IV | Brazil | MG | ON022430 Brazil MG Monkey 2017-03-21 |
| ON022431 | 2017-12-05 | Monkey | 2005/17 IV | Brazil | MG | ON022431 Brazil MG Monkey 2017-12-05 |
| ON022432 | 2017-12-07 | Monkey | 2065/17 IV | Brazil | MG | ON022432 Brazil MG Monkey 2017-12-07 |
| ON022433 | 2018-02-26 | Monkey | 3048/2018  | Brazil | RJ | ON022433 Brazil RJ Monkey 2018-02-26 |
| ON022434 | 2018-02-08 | Monkey | 2222/2018  | Brazil | RJ | ON022434 Brazil RJ Monkey 2018-02-08 |
| ON022435 | 2017-10-23 | Monkey | 7578/2017  | Brazil | RJ | ON022435 Brazil RJ Monkey 2017-10-23 |
| ON022436 | 2018-02-26 | Monkey | 3052/2018  | Brazil | RJ | ON022436 Brazil RJ Monkey 2018-02-26 |
| ON022437 | 2018-02-05 | Monkey | 1542/2018  | Brazil | RJ | ON022437 Brazil RJ Monkey 2018-02-05 |
| ON022438 | 2018-03-20 | Monkey | 3953/2018  | Brazil | RJ | ON022438 Brazil RJ Monkey 2018-03-20 |
| ON022439 | 2017-04-20 | Monkey | 4884/2017  | Brazil | RJ | ON022439 Brazil RJ Monkey 2017-04-20 |
| ON022440 | 2018-02-05 | Monkey | 1544/2018  | Brazil | RJ | ON022440 Brazil RJ Monkey 2018-02-05 |
| ON022441 | 2018-04-09 | Monkey | 4789/2018  | Brazil | RJ | ON022441 Brazil RJ Monkey 2018-04-09 |

|          |            |        |           |        |    |                                      |
|----------|------------|--------|-----------|--------|----|--------------------------------------|
| ON022442 | 2018-04-17 | Monkey | 5509/2018 | Brazil | RJ | ON022442 Brazil RJ Monkey 2018-04-17 |
| ON022443 | 2017-05-19 | Monkey | 5597/2017 | Brazil | RJ | ON022443 Brazil RJ Monkey 2017-05-19 |
| ON022444 | 2017-03-20 | Monkey | 2142/2017 | Brazil | ES | ON022444 Brazil ES Monkey 2017-03-20 |
| ON022445 | 2018-01-22 | Monkey | 0791/2018 | Brazil | RJ | ON022445 Brazil RJ Monkey 2018-01-22 |
| ON022446 | 2017-04-03 | Monkey | 3058/2017 | Brazil | ES | ON022446 Brazil ES Monkey 2017-04-03 |
| ON022447 | 2017-04-02 | Human  | 3480/2017 | Brazil | ES | ON022447 Brazil ES Human 2017-04-02  |
| ON022448 | 2018-04-12 | Monkey | 5058/2018 | Brazil | RJ | ON022448 Brazil RJ Monkey 2018-04-12 |
| ON022449 | 2018-03-13 | Monkey | 3637/2018 | Brazil | RJ | ON022449 Brazil RJ Monkey 2018-03-13 |
| ON022450 | 2018-01-24 | Monkey | 1036/2018 | Brazil | RJ | ON022450 Brazil RJ Monkey 2018-01-24 |
| ON022451 | 2018-01-18 | Monkey | 0803/2018 | Brazil | RJ | ON022451 Brazil RJ Monkey 2018-01-18 |
| ON022452 | 2018-02-19 | Monkey | 2454/2018 | Brazil | RJ | ON022452 Brazil RJ Monkey 2018-02-19 |
| ON022453 | 2018-02-28 | Monkey | 3144/2018 | Brazil | RJ | ON022453 Brazil RJ Monkey 2018-02-28 |
| ON022454 | 2018-02-19 | Monkey | 2380/2018 | Brazil | RJ | ON022454 Brazil RJ Monkey 2018-02-19 |
| ON022455 | 2017-05-02 | Monkey | 5280/2017 | Brazil | RJ | ON022455 Brazil RJ Monkey 2017-05-02 |
| ON022456 | 2017-01-23 | Monkey | 0250/2017 | Brazil | ES | ON022456 Brazil ES Monkey 2017-01-23 |
| ON022457 | 2018-04-03 | Monkey | 4580/2018 | Brazil | RJ | ON022457 Brazil RJ Monkey 2018-04-03 |
| ON022458 | 2018-02-05 | Monkey | 1537/2018 | Brazil | RJ | ON022458 Brazil RJ Monkey 2018-02-05 |
| ON022459 | 2018-03-13 | Monkey | 3634/2018 | Brazil | RJ | ON022459 Brazil RJ Monkey 2018-03-13 |
| ON022460 | 2017-04-17 | Monkey | 4271/2017 | Brazil | RJ | ON022460 Brazil RJ Monkey 2017-04-17 |
| ON022461 | 2017-01-24 | Monkey | 0253/2017 | Brazil | ES | ON022461 Brazil ES Monkey 2017-01-24 |
| ON022462 | 2018-04-13 | Monkey | 5046/2018 | Brazil | RJ | ON022462 Brazil RJ Monkey 2018-04-13 |
| ON022463 | 2017-04-17 | Monkey | 4301/2017 | Brazil | RJ | ON022463 Brazil RJ Monkey 2017-04-17 |
| ON022464 | 2017-01-26 | Monkey | 0440/2017 | Brazil | ES | ON022464 Brazil ES Monkey 2017-01-26 |
| ON022465 | 2018-04-03 | Monkey | 4584/2018 | Brazil | RJ | ON022465 Brazil RJ Monkey 2018-04-03 |
| ON022466 | 2017-05-19 | Monkey | 5599/2017 | Brazil | RJ | ON022466 Brazil RJ Monkey 2017-05-19 |
| ON022467 | 2017-04-24 | Monkey | 4886/2017 | Brazil | RJ | ON022467 Brazil RJ Monkey 2017-04-24 |
| ON022468 | 2017-03-06 | Monkey | 2123/2017 | Brazil | ES | ON022468 Brazil ES Monkey 2017-03-06 |
| ON022469 | 2017-04-20 | Monkey | 4878/2017 | Brazil | RJ | ON022469 Brazil RJ Monkey 2017-04-20 |
| ON022470 | 2018-02-15 | Human  | 1934/2018 | Brazil | RJ | ON022470 Brazil RJ Human 2018-02-15  |
| ON022471 | 2018-01-24 | Human  | 0612/2018 | Brazil | RJ | ON022471 Brazil RJ Human 2018-01-24  |
| ON022472 | 2018-02-24 | Human  | 2643/2018 | Brazil | RJ | ON022472 Brazil RJ Human 2018-02-24  |
| ON022473 | 2018-02-16 | Human  | 2291/2018 | Brazil | RJ | ON022473 Brazil RJ Human 2018-02-16  |
| ON022474 | 2018-02-18 | Human  | 5435/2018 | Brazil | MG | ON022474 Brazil MG Human 2018-02-18  |
| ON022475 | 2018-02-22 | Human  | 2544/2018 | Brazil | RJ | ON022475 Brazil RJ Human 2018-02-22  |

|          |            |       |           |        |    |                                     |
|----------|------------|-------|-----------|--------|----|-------------------------------------|
| ON022476 | 2018-02-06 | Human | 1617/2018 | Brazil | RJ | ON022476 Brazil RJ Human 2018-02-06 |
| ON022477 | 2018-02-14 | Human | 1949/2018 | Brazil | RJ | ON022477 Brazil RJ Human 2018-02-14 |
| ON022478 | 2018-02-09 | Human | 2054/2018 | Brazil | RJ | ON022478 Brazil RJ Human 2018-02-09 |
| ON022479 | 2018-01-24 | Human | 0730/2018 | Brazil | RJ | ON022479 Brazil RJ Human 2018-01-24 |
| ON022480 | 2018-02-19 | Human | 2301/2018 | Brazil | RJ | ON022480 Brazil RJ Human 2018-02-19 |
| ON022481 | 2018-02-16 | Human | 2055/2018 | Brazil | RJ | ON022481 Brazil RJ Human 2018-02-16 |
| ON022482 | 2018-02-20 | Human | 2540/2018 | Brazil | RJ | ON022482 Brazil RJ Human 2018-02-20 |
| ON022483 | 2018-02-16 | Human | 2138/2018 | Brazil | RJ | ON022483 Brazil RJ Human 2018-02-16 |
| ON022484 | 2018-02-20 | Human | 2137/2018 | Brazil | RJ | ON022484 Brazil RJ Human 2018-02-20 |
| ON022485 | 2018-02-08 | Human | 1781/2018 | Brazil | RJ | ON022485 Brazil RJ Human 2018-02-08 |
| ON022486 | 2018-02-22 | Human | 2634/2018 | Brazil | RJ | ON022486 Brazil RJ Human 2018-02-22 |
| ON022487 | 2018-02-19 | Human | 2136/2018 | Brazil | RJ | ON022487 Brazil RJ Human 2018-02-19 |
| ON022488 | 2018-02-11 | Human | 1828/2018 | Brazil | RJ | ON022488 Brazil RJ Human 2018-02-11 |
| ON022489 | 2018-02-06 | Human | 1797/2018 | Brazil | RJ | ON022489 Brazil RJ Human 2018-02-06 |
| ON022490 | 2018-02-15 | Human | 1950/2018 | Brazil | RJ | ON022490 Brazil RJ Human 2018-02-15 |
| ON022491 | 2018-02-09 | Human | 2153/2018 | Brazil | RJ | ON022491 Brazil RJ Human 2018-02-09 |
| ON022492 | 2018-01-20 | Human | 0569/2018 | Brazil | RJ | ON022492 Brazil RJ Human 2018-01-20 |
| ON022493 | 2018-02-21 | Human | 2498/2018 | Brazil | RJ | ON022493 Brazil RJ Human 2018-02-21 |
| ON022494 | 2018-02-17 | Human | 2663/2018 | Brazil | RJ | ON022494 Brazil RJ Human 2018-02-17 |
| ON022495 | 2018-02-09 | Human | 2334/2018 | Brazil | RS | ON022495 Brazil RS Human 2018-02-09 |
| ON022496 | 2017-02-24 | Human | 1547/2017 | Brazil | ES | ON022496 Brazil ES Human 2017-02-24 |
| ON022497 | 2018-02-21 | Human | 2545/2018 | Brazil | RJ | ON022497 Brazil RJ Human 2018-02-21 |
| ON022498 | 2018-01-25 | Human | 0913/2018 | Brazil | RJ | ON022498 Brazil RJ Human 2018-01-25 |
| ON022499 | 2018-02-21 | Human | 2497/2018 | Brazil | RJ | ON022499 Brazil RJ Human 2018-02-21 |
| ON022500 | 2018-02-19 | Human | 2176/2018 | Brazil | RJ | ON022500 Brazil RJ Human 2018-02-19 |
| ON022501 | 2018-02-20 | Human | 2146/2018 | Brazil | RJ | ON022501 Brazil RJ Human 2018-02-20 |
| ON022502 | 2018-02-19 | Human | 2139/2018 | Brazil | RJ | ON022502 Brazil RJ Human 2018-02-19 |
| ON022503 | 2018-02-05 | Human | 1840/2018 | Brazil | RJ | ON022503 Brazil RJ Human 2018-02-05 |
| ON022504 | 2017-03-17 | Human | 2153/2017 | Brazil | ES | ON022504 Brazil ES Human 2017-03-17 |
| ON022505 | 2018-02-21 | Human | 2051/2018 | Brazil | RJ | ON022505 Brazil RJ Human 2018-02-21 |
| ON022506 | 2018-01-24 | Human | 1004/2018 | Brazil | RJ | ON022506 Brazil RJ Human 2018-01-24 |
| ON022507 | 2018-01-18 | Human | 0568/2018 | Brazil | RJ | ON022507 Brazil RJ Human 2018-01-18 |
| ON022508 | 2018-01-25 | Human | 0921/2018 | Brazil | RJ | ON022508 Brazil RJ Human 2018-01-25 |
| ON022509 | 2018-02-05 | Human | 1577/2018 | Brazil | RJ | ON022509 Brazil RJ Human 2018-02-05 |

|          |            |        |           |        |    |                                      |
|----------|------------|--------|-----------|--------|----|--------------------------------------|
| ON022510 | 2017-03-02 | Human  | 1532/2017 | Brazil | ES | ON022510 Brazil ES Human 2017-03-02  |
| ON022511 | 2018-02-22 | Human  | 2555/2018 | Brazil | RJ | ON022511 Brazil RJ Human 2018-02-22  |
| ON022512 | 2018-02-20 | Human  | 2551/2018 | Brazil | RJ | ON022512 Brazil RJ Human 2018-02-20  |
| ON022513 | 2018-02-11 | Human  | 2151/2018 | Brazil | RJ | ON022513 Brazil RJ Human 2018-02-11  |
| ON022514 | 2018-01-24 | Human  | 0620/2018 | Brazil | RJ | ON022514 Brazil RJ Human 2018-01-24  |
| ON022515 | 2018-02-22 | Human  | 2635/2018 | Brazil | RJ | ON022515 Brazil RJ Human 2018-02-22  |
| ON022516 | 2018-01-20 | Human  | 0402/2018 | Brazil | RJ | ON022516 Brazil RJ Human 2018-01-20  |
| ON022517 | 2018-02-05 | Monkey | 1868/2018 | Brazil | RJ | ON022517 Brazil RJ Monkey 2018-02-05 |
| ON022518 | 2017-02-27 | Monkey | 2069/2017 | Brazil | ES | ON022518 Brazil ES Monkey 2017-02-27 |
| ON022519 | 2017-04-18 | Monkey | 4871/2017 | Brazil | RJ | ON022519 Brazil RJ Monkey 2017-04-18 |
| ON022520 | 2017-03-07 | Human  | 1813/2017 | Brazil | ES | ON022520 Brazil ES Human 2017-03-07  |
| ON022521 | 2017-04-25 | Human  | 5022/2017 | Brazil | RJ | ON022521 Brazil RJ Human 2017-04-25  |
| ON022522 | 2017-06-02 | Human  | 5817/2017 | Brazil | RJ | ON022522 Brazil RJ Human 2017-06-02  |
| ON022523 | 2017-02-21 | Human  | 1442/2017 | Brazil | ES | ON022523 Brazil ES Human 2017-02-21  |
| ON022524 | 2017-01-30 | Human  | 0712/2017 | Brazil | ES | ON022524 Brazil ES Human 2017-01-30  |
| ON022525 | 2017-XX-XX | Human  | 1526/2017 | Brazil | ES | ON022525 Brazil ES Human 2017-XX-XX  |
| ON022526 | 2018-02-13 | Human  | 1839/2018 | Brazil | RJ | ON022526 Brazil RJ Human 2018-02-13  |
| ON022527 | 2017-02-22 | Human  | 1522/2017 | Brazil | ES | ON022527 Brazil ES Human 2017-02-22  |
| ON022528 | 2017-02-12 | Human  | 1527/2017 | Brazil | ES | ON022528 Brazil ES Human 2017-02-12  |
| ON022529 | 2017-03-16 | Human  | 1994/2017 | Brazil | ES | ON022529 Brazil ES Human 2017-03-16  |
| ON022530 | 2018-01-25 | Monkey | 3851/2018 | Brazil | ES | ON022530 Brazil ES Monkey 2018-01-25 |
| ON022531 | 2017-01-20 | Human  | 0231/2017 | Brazil | ES | ON022531 Brazil ES Human 2017-01-20  |
| ON022532 | 2017-01-29 | Human  | 0404/2017 | Brazil | ES | ON022532 Brazil ES Human 2017-01-29  |
| ON022533 | 2018-02-11 | Human  | 1821/2018 | Brazil | RJ | ON022533 Brazil RJ Human 2018-02-11  |
| ON022534 | 2018-02-27 | Human  | 0766/2018 | Brazil | RJ | ON022534 Brazil RJ Human 2018-02-27  |
| ON022535 | 2017-01-26 | Human  | 0277/2017 | Brazil | ES | ON022535 Brazil ES Human 2017-01-26  |
| ON022536 | 2017-01-25 | Human  | 0273/2017 | Brazil | ES | ON022536 Brazil ES Human 2017-01-25  |
| ON022537 | 2017-02-06 | Human  | 0760/2017 | Brazil | ES | ON022537 Brazil ES Human 2017-02-06  |
| ON022538 | 2017-01-27 | Human  | 0725/2017 | Brazil | ES | ON022538 Brazil ES Human 2017-01-27  |
| ON022539 | 2017-02-10 | Human  | 1123/2017 | Brazil | ES | ON022539 Brazil ES Human 2017-02-10  |
| ON022540 | 2018-03-11 | Human  | CP6       | Brazil | SP | ON022540 Brazil SP Human 2018-03-11  |
| ON022541 | 2018-03-28 | Human  | CP12      | Brazil | SP | ON022541 Brazil SP Human 2018-03-28  |
| ON022542 | 2018-03-28 | Human  | CP13      | Brazil | SP | ON022542 Brazil SP Human 2018-03-28  |
| ON022543 | 2018-04-11 | Human  | CP16      | Brazil | SP | ON022543 Brazil SP Human 2018-04-11  |



|          |            |        |           |        |    |                                      |
|----------|------------|--------|-----------|--------|----|--------------------------------------|
| ON022544 | 2018-04-15 | Human  | CP18      | Brazil | SP | ON022544 Brazil SP Human 2018-04-15  |
| ON022545 | 2019-01-15 | Human  | CP20      | Brazil | SP | ON022545 Brazil SP Human 2019-01-15  |
| ON022546 | 2019-01-15 | Human  | CP21      | Brazil | SP | ON022546 Brazil SP Human 2019-01-15  |
| ON022547 | 2019-01-18 | Human  | CP22      | Brazil | SP | ON022547 Brazil SP Human 2019-01-18  |
| ON022548 | 2019-01-19 | Human  | CP23      | Brazil | SP | ON022548 Brazil SP Human 2019-01-19  |
| ON022550 | 2019-01-30 | Human  | CP28      | Brazil | SP | ON022550 Brazil SP Human 2019-01-30  |
| ON022551 | 2019-02-17 | Human  | CP31      | Brazil | SP | ON022551 Brazil SP Human 2019-02-17  |
| ON022552 | 2019-02-24 | Human  | CP33      | Brazil | SP | ON022552 Brazil SP Human 2019-02-24  |
| ON022554 | 2018-03-14 | Human  | CP38      | Brazil | SP | ON022554 Brazil SP Human 2018-03-14  |
| ON022555 | 2019-01-09 | Human  | CP42      | Brazil | SP | ON022555 Brazil SP Human 2019-01-09  |
| ON022556 | 2019-01-14 | Human  | CP43      | Brazil | SP | ON022556 Brazil SP Human 2019-01-14  |
| ON022557 | 2019-01-14 | Human  | CP44      | Brazil | SP | ON022557 Brazil SP Human 2019-01-14  |
| ON022558 | 2019-01-20 | Human  | CP46      | Brazil | SP | ON022558 Brazil SP Human 2019-01-20  |
| ON022559 | 2019-01-31 | Human  | CP49      | Brazil | SP | ON022559 Brazil SP Human 2019-01-31  |
| ON022560 | 2019-02-06 | Human  | CP50      | Brazil | SP | ON022560 Brazil SP Human 2019-02-06  |
| ON022561 | 2019-02-07 | Human  | CP51      | Brazil | SP | ON022561 Brazil SP Human 2019-02-07  |
| ON022562 | 2019-02-07 | Human  | CP52      | Brazil | SP | ON022562 Brazil SP Human 2019-02-07  |
| ON022563 | 2019-01-20 | Human  | CP24      | Brazil | SP | ON022563 Brazil SP Human 2019-01-20  |
| ON022565 | 2018-01-02 | Monkey | PNH2803   | Brazil | SP | ON022565 Brazil SP Monkey 2018-01-02 |
| ON022566 | 2017-12-21 | Monkey | PNH2772   | Brazil | SP | ON022566 Brazil SP Monkey 2017-12-21 |
| ON022567 | 2017-12-21 | Monkey | PNH2773   | Brazil | SP | ON022567 Brazil SP Monkey 2017-12-21 |
| ON022568 | 2017-12-28 | Monkey | PNH2777   | Brazil | SP | ON022568 Brazil SP Monkey 2017-12-28 |
| ON022569 | 2018-01-06 | Monkey | PNH2806   | Brazil | SP | ON022569 Brazil SP Monkey 2018-01-06 |
| ON022570 | 2017-12-19 | Monkey | PNH2792   | Brazil | SP | ON022570 Brazil SP Monkey 2017-12-19 |
| ON022571 | 2017-12-20 | Monkey | PNH2795   | Brazil | SP | ON022571 Brazil SP Monkey 2017-12-20 |
| ON022572 | 2018-03-01 | Monkey | PNH3568   | Brazil | SP | ON022572 Brazil SP Monkey 2018-03-01 |
| ON022573 | 2017-03-28 | Monkey | PNH951    | Brazil | SP | ON022573 Brazil SP Monkey 2017-03-28 |
| ON022574 | 2017-03-17 | Monkey | PNH968    | Brazil | SP | ON022574 Brazil SP Monkey 2017-03-17 |
| ON022575 | 2017-03-27 | Monkey | PNH880    | Brazil | SP | ON022575 Brazil SP Monkey 2017-03-27 |
| ON022576 | 2017-04-04 | Monkey | PNH983    | Brazil | SP | ON022576 Brazil SP Monkey 2017-04-04 |
| ON022577 | 2018-06-08 | Monkey | PNH4179/1 | Brazil | SP | ON022577 Brazil SP Monkey 2018-06-08 |
| ON022578 | 2017-02-24 | Monkey | PNH558    | Brazil | SP | ON022578 Brazil SP Monkey 2017-02-24 |
| ON022579 | 2017-04-01 | Monkey | PNH990    | Brazil | SP | ON022579 Brazil SP Monkey 2017-04-01 |
| ON022580 | 2017-04-03 | Monkey | PNH987    | Brazil | SP | ON022580 Brazil SP Monkey 2017-04-03 |

|          |            |        |                   |     |        |    |                                      |
|----------|------------|--------|-------------------|-----|--------|----|--------------------------------------|
| ON022581 | 2017-01-23 | Monkey |                   | 302 | Brazil | SP | ON022581 Brazil SP Monkey 2017-01-23 |
| ON022582 | 2017-02-27 | Monkey | PNH493            |     | Brazil | SP | ON022582 Brazil SP Monkey 2017-02-27 |
| ON022583 | 2018-06-05 | Monkey | PNH4183           |     | Brazil | SP | ON022583 Brazil SP Monkey 2018-06-05 |
| ON022584 | 2018-03-17 | Monkey | PNH3452           |     | Brazil | SP | ON022584 Brazil SP Monkey 2018-03-17 |
| ON022585 | 2018-03-15 | Monkey | PNH3460           |     | Brazil | SP | ON022585 Brazil SP Monkey 2018-03-15 |
| ON022586 | 2018-01-14 | Monkey | PNH2915           |     | Brazil | SP | ON022586 Brazil SP Monkey 2018-01-14 |
| ON022587 | 2018-01-28 | Monkey | PNH2984           |     | Brazil | SP | ON022587 Brazil SP Monkey 2018-01-28 |
| ON022588 | 2018-01-22 | Monkey | PNH2987           |     | Brazil | SP | ON022588 Brazil SP Monkey 2018-01-22 |
| ON022589 | 2018-01-31 | Monkey | PNH3025           |     | Brazil | SP | ON022589 Brazil SP Monkey 2018-01-31 |
| ON022590 | 2018-01-31 | Monkey | PNH3089           |     | Brazil | SP | ON022590 Brazil SP Monkey 2018-01-31 |
| ON022591 | 2018-02-09 | Monkey | PNH3254           |     | Brazil | SP | ON022591 Brazil SP Monkey 2018-02-09 |
| ON022592 | 2018-02-19 | Monkey | PNH3273           |     | Brazil | SP | ON022592 Brazil SP Monkey 2018-02-19 |
| ON022593 | 2018-03-21 | Monkey | PNH3533           |     | Brazil | SP | ON022593 Brazil SP Monkey 2018-03-21 |
| ON022594 | 2018-01-23 | Monkey | PNH2989           |     | Brazil | SP | ON022594 Brazil SP Monkey 2018-01-23 |
| ON022595 | 2018-05-03 | Monkey | PNH3896           |     | Brazil | SP | ON022595 Brazil SP Monkey 2018-05-03 |
| ON022596 | 2017-04-29 | Monkey | PNH1296           |     | Brazil | SP | ON022596 Brazil SP Monkey 2017-04-29 |
| ON022597 | 2018-01-16 | Monkey | PNH3349           |     | Brazil | SP | ON022597 Brazil SP Monkey 2018-01-16 |
| ON022598 | 2018-01-17 | Monkey | PNH3350           |     | Brazil | SP | ON022598 Brazil SP Monkey 2018-01-17 |
| ON022599 | 2018-02-20 | Monkey | PNH3299           |     | Brazil | SP | ON022599 Brazil SP Monkey 2018-02-20 |
| ON022600 | 2016-12-13 | Monkey | PNH152            |     | Brazil | SP | ON022600 Brazil SP Monkey 2016-12-13 |
| ON022601 | 2017-12-25 | Monkey | PNH2754           |     | Brazil | SP | ON022601 Brazil SP Monkey 2017-12-25 |
| ON022602 | 2018-02-09 | Monkey | PNH3278_duplicate |     | Brazil | SP | ON022602 Brazil SP Monkey 2018-02-09 |
| ON022603 | 2018-01-04 | Monkey | PNH2871           |     | Brazil | SP | ON022603 Brazil SP Monkey 2018-01-04 |
| ON022604 | 2017-06-04 | Monkey | PNH1641           |     | Brazil | SP | ON022604 Brazil SP Monkey 2017-06-04 |
| ON022605 | 2017-06-14 | Monkey | PNH1648           |     | Brazil | SP | ON022605 Brazil SP Monkey 2017-06-14 |
| ON022606 | 2017-07-04 | Monkey | PNH1766           |     | Brazil | SP | ON022606 Brazil SP Monkey 2017-07-04 |
| ON022607 | 2017-07-07 | Monkey | PNH1790           |     | Brazil | SP | ON022607 Brazil SP Monkey 2017-07-07 |
| ON022608 | 2017-05-05 | Monkey | PNH1396           |     | Brazil | SP | ON022608 Brazil SP Monkey 2017-05-05 |
| ON022609 | 2017-12-08 | Monkey | PNH2655           |     | Brazil | SP | ON022609 Brazil SP Monkey 2017-12-08 |
| ON022610 | 2017-07-17 | Monkey | PNH1794           |     | Brazil | SP | ON022610 Brazil SP Monkey 2017-07-17 |
| ON022611 | 2017-04-17 | Monkey | PNH1251           |     | Brazil | SP | ON022611 Brazil SP Monkey 2017-04-17 |
| ON022612 | 2017-04-17 | Monkey | PNH1268           |     | Brazil | SP | ON022612 Brazil SP Monkey 2017-04-17 |
| ON022613 | 2017-05-17 | Monkey | PNH1470           |     | Brazil | SP | ON022613 Brazil SP Monkey 2017-05-17 |
| ON022614 | 2017-05-11 | Monkey | PNH1502           |     | Brazil | SP | ON022614 Brazil SP Monkey 2017-05-11 |

|          |            |        |         |        |    |                                      |
|----------|------------|--------|---------|--------|----|--------------------------------------|
| ON022615 | 2017-04-10 | Monkey | PNH1255 | Brazil | SP | ON022615 Brazil SP Monkey 2017-04-10 |
| ON022616 | 2017-04-20 | Monkey | PNH1238 | Brazil | SP | ON022616 Brazil SP Monkey 2017-04-20 |
| ON022617 | 2017-05-03 | Monkey | PNH1299 | Brazil | SP | ON022617 Brazil SP Monkey 2017-05-03 |
| ON022618 | 2017-04-16 | Monkey | PNH1265 | Brazil | SP | ON022618 Brazil SP Monkey 2017-04-16 |
| ON022619 | 2017-04-28 | Monkey | PNH1301 | Brazil | SP | ON022619 Brazil SP Monkey 2017-04-28 |
| ON022620 | 2017-12-14 | Monkey | PNH2683 | Brazil | SP | ON022620 Brazil SP Monkey 2017-12-14 |
| ON022621 | 2017-04-12 | Monkey | PNH1262 | Brazil | SP | ON022621 Brazil SP Monkey 2017-04-12 |
| ON022622 | 2017-12-07 | Monkey | PNH2691 | Brazil | SP | ON022622 Brazil SP Monkey 2017-12-07 |
| ON022623 | 2017-12-13 | Monkey | PNH2686 | Brazil | SP | ON022623 Brazil SP Monkey 2017-12-13 |
| ON022624 | 2017-12-17 | Monkey | PNH2688 | Brazil | SP | ON022624 Brazil SP Monkey 2017-12-17 |
| ON022625 | 2017-12-19 | Monkey | PNH2694 | Brazil | SP | ON022625 Brazil SP Monkey 2017-12-19 |
| ON022626 | 2017-11-14 | Monkey | PNH2402 | Brazil | SP | ON022626 Brazil SP Monkey 2017-11-14 |
| ON022627 | 2017-12-12 | Monkey | PNH2702 | Brazil | SP | ON022627 Brazil SP Monkey 2017-12-12 |
| ON022628 | 2017-12-12 | Monkey | PNH2707 | Brazil | SP | ON022628 Brazil SP Monkey 2017-12-12 |
| ON022629 | 2017-12-12 | Monkey | PNH2715 | Brazil | SP | ON022629 Brazil SP Monkey 2017-12-12 |
| ON022630 | 2017-12-21 | Monkey | PNH2725 | Brazil | SP | ON022630 Brazil SP Monkey 2017-12-21 |
| ON022631 | 2017-12-21 | Monkey | PNH2728 | Brazil | SP | ON022631 Brazil SP Monkey 2017-12-21 |
| ON022632 | 2017-12-20 | Monkey | PNH2731 | Brazil | SP | ON022632 Brazil SP Monkey 2017-12-20 |
| ON022633 | 2017-12-22 | Monkey | PNH2743 | Brazil | SP | ON022633 Brazil SP Monkey 2017-12-22 |
| ON022634 | 2017-11-07 | Monkey | PNH2399 | Brazil | SP | ON022634 Brazil SP Monkey 2017-11-07 |
| ON022635 | 2017-07-20 | Monkey | PNH1830 | Brazil | SP | ON022635 Brazil SP Monkey 2017-07-20 |
| ON022636 | 2017-10-19 | Monkey | PNH2636 | Brazil | SP | ON022636 Brazil SP Monkey 2017-10-19 |
| ON022637 | 2017-11-14 | Monkey | PNH2405 | Brazil | SP | ON022637 Brazil SP Monkey 2017-11-14 |
| ON022638 | 2017-10-13 | Monkey | PNH2635 | Brazil | SP | ON022638 Brazil SP Monkey 2017-10-13 |
| ON022639 | 2017-11-07 | Monkey | PNH2632 | Brazil | SP | ON022639 Brazil SP Monkey 2017-11-07 |
| ON022640 | 2017-09-21 | Monkey | PNH2573 | Brazil | SP | ON022640 Brazil SP Monkey 2017-09-21 |
| ON022641 | 2017-09-21 | Monkey | PNH2576 | Brazil | SP | ON022641 Brazil SP Monkey 2017-09-21 |
| ON022642 | 2017-12-05 | Monkey | PNH2514 | Brazil | SP | ON022642 Brazil SP Monkey 2017-12-05 |
| ON022643 | 2017-04-25 | Monkey | PNH1227 | Brazil | SP | ON022643 Brazil SP Monkey 2017-04-25 |
| ON022644 | 2017-10-27 | Monkey | PNH2547 | Brazil | SP | ON022644 Brazil SP Monkey 2017-10-27 |
| ON022645 | 2017-10-25 | Monkey | PNH2550 | Brazil | SP | ON022645 Brazil SP Monkey 2017-10-25 |
| ON022646 | 2017-04-25 | Monkey | PNH1230 | Brazil | SP | ON022646 Brazil SP Monkey 2017-04-25 |
| ON022647 | 2017-04-20 | Monkey | PNH1235 | Brazil | SP | ON022647 Brazil SP Monkey 2017-04-20 |
| ON022648 | 2017-09-20 | Monkey | PNH2030 | Brazil | SP | ON022648 Brazil SP Monkey 2017-09-20 |

|          |            |        |           |      |        |    |                                      |
|----------|------------|--------|-----------|------|--------|----|--------------------------------------|
| ON022649 | 2017-09-25 | Monkey | PNH2301   |      | Brazil | SP | ON022649 Brazil SP Monkey 2017-09-25 |
| ON022650 | 2017-11-28 | Monkey | PNH2408   |      | Brazil | SP | ON022650 Brazil SP Monkey 2017-11-28 |
| ON022651 | 2017-09-06 | Monkey | PNH2570   |      | Brazil | SP | ON022651 Brazil SP Monkey 2017-09-06 |
| ON022652 | 2017-11-30 | Monkey | PNH2473   |      | Brazil | SP | ON022652 Brazil SP Monkey 2017-11-30 |
| ON022653 | 2017-12-04 | Monkey | PNH2479   |      | Brazil | SP | ON022653 Brazil SP Monkey 2017-12-04 |
| ON022654 | 2017-12-04 | Monkey | PNH2482   |      | Brazil | SP | ON022654 Brazil SP Monkey 2017-12-04 |
| ON022655 | 2017-12-05 | Monkey | PNH2511   |      | Brazil | SP | ON022655 Brazil SP Monkey 2017-12-05 |
| ON022656 | 2018-02-12 | Monkey | PNH3122   |      | Brazil | SP | ON022656 Brazil SP Monkey 2018-02-12 |
| ON022657 | 2018-01-15 | Monkey | PNH3123   |      | Brazil | SP | ON022657 Brazil SP Monkey 2018-01-15 |
| ON022658 | 2018-01-29 | Monkey | PNH3071   |      | Brazil | SP | ON022658 Brazil SP Monkey 2018-01-29 |
| ON022659 | 2018-02-02 | Monkey | PNH3073   |      | Brazil | SP | ON022659 Brazil SP Monkey 2018-02-02 |
| ON022660 | 2018-06-15 | Monkey | PNH4225/3 |      | Brazil | SP | ON022660 Brazil SP Monkey 2018-06-15 |
| ON022661 | 2017-03-09 | Monkey | PNH642    |      | Brazil | SP | ON022661 Brazil SP Monkey 2017-03-09 |
| ON022662 | 2017-05-05 | Monkey | PNH1395   |      | Brazil | SP | ON022662 Brazil SP Monkey 2017-05-05 |
| ON022663 | 2017-09-01 | Monkey |           | 1954 | Brazil | SP | ON022663 Brazil SP Monkey 2017-09-01 |
| ON022664 | 2017-09-25 | Monkey | PNH2302   |      | Brazil | SP | ON022664 Brazil SP Monkey 2017-09-25 |
| ON022665 | 2017-11-06 | Monkey | PNH2294   |      | Brazil | SP | ON022665 Brazil SP Monkey 2017-11-06 |
| ON022666 | 2017-12-11 | Monkey | PNH2811   |      | Brazil | SP | ON022666 Brazil SP Monkey 2017-12-11 |
| ON022667 | 2017-12-20 | Monkey | PNH2799   |      | Brazil | SP | ON022667 Brazil SP Monkey 2017-12-20 |
| ON022668 | 2018-03-20 | Monkey | PNH3552   |      | Brazil | SP | ON022668 Brazil SP Monkey 2018-03-20 |
| ON022669 | 2018-03-26 | Monkey | PNH3555   |      | Brazil | SP | ON022669 Brazil SP Monkey 2018-03-26 |
| ON022670 | 2018-01-06 | Monkey | PNH2890   |      | Brazil | SP | ON022670 Brazil SP Monkey 2018-01-06 |
| ON022671 | 2018-01-06 | Monkey | PNH2888   |      | Brazil | SP | ON022671 Brazil SP Monkey 2018-01-06 |
| ON022672 | 2018-01-07 | Monkey | PNH2887   |      | Brazil | SP | ON022672 Brazil SP Monkey 2018-01-07 |
| ON022673 | 2018-03-14 | Monkey | PNH3557   |      | Brazil | SP | ON022673 Brazil SP Monkey 2018-03-14 |
| ON022674 | 2018-03-19 | Monkey | PNH3560   |      | Brazil | SP | ON022674 Brazil SP Monkey 2018-03-19 |
| ON022675 | 2018-03-10 | Monkey | PNH3565   |      | Brazil | SP | ON022675 Brazil SP Monkey 2018-03-10 |
| ON022676 | 2019-04-16 | Monkey | PNH5475   |      | Brazil | SP | ON022676 Brazil SP Monkey 2019-04-16 |
| ON022677 | 2017-04-10 | Monkey | PNH1019   |      | Brazil | SP | ON022677 Brazil SP Monkey 2017-04-10 |
| ON022679 | 2017-03-31 | Monkey | PNH1045   |      | Brazil | SP | ON022679 Brazil SP Monkey 2017-03-31 |
| ON022680 | 2017-04-06 | Monkey | PNH1041   |      | Brazil | SP | ON022680 Brazil SP Monkey 2017-04-06 |
| ON022681 | 2017-04-10 | Monkey | PNH1038   |      | Brazil | SP | ON022681 Brazil SP Monkey 2017-04-10 |
| ON022682 | 2017-03-17 | Monkey | PNH733    |      | Brazil | SP | ON022682 Brazil SP Monkey 2017-03-17 |
| ON022683 | 2017-03-17 | Monkey | PNH772    |      | Brazil | SP | ON022683 Brazil SP Monkey 2017-03-17 |



|          |            |        |                |        |    |                                      |
|----------|------------|--------|----------------|--------|----|--------------------------------------|
| ON022684 | 2017-03-16 | Monkey | PNH713         | Brazil | SP | ON022684 Brazil SP Monkey 2017-03-16 |
| ON022685 | 2017-03-21 | Monkey | PNH702         | Brazil | SP | ON022685 Brazil SP Monkey 2017-03-21 |
| ON022686 | 2016-12-09 | Monkey | PNH185         | Brazil | SP | ON022686 Brazil SP Monkey 2016-12-09 |
| ON022687 | 2017-03-28 | Monkey | PNH866         | Brazil | SP | ON022687 Brazil SP Monkey 2017-03-28 |
| ON022688 | 2016-11-21 | Monkey | PNH149         | Brazil | SP | ON022688 Brazil SP Monkey 2016-11-21 |
| ON022689 | 2017-03-23 | Monkey | PNH885         | Brazil | SP | ON022689 Brazil SP Monkey 2017-03-23 |
| ON022690 | 2017-03-25 | Monkey | PNH862         | Brazil | SP | ON022690 Brazil SP Monkey 2017-03-25 |
| ON022691 | 2017-03-21 | Monkey | PNH872         | Brazil | SP | ON022691 Brazil SP Monkey 2017-03-21 |
| ON022692 | 2017-03-29 | Monkey | PNH979         | Brazil | SP | ON022692 Brazil SP Monkey 2017-03-29 |
| ON022693 | 2017-03-23 | Monkey | PNH876         | Brazil | SP | ON022693 Brazil SP Monkey 2017-03-23 |
| ON022694 | 2018-03-25 | Monkey | PNH3681        | Brazil | SP | ON022694 Brazil SP Monkey 2018-03-25 |
| ON022695 | 2018-01-25 | Monkey | PNH2998        | Brazil | SP | ON022695 Brazil SP Monkey 2018-01-25 |
| ON022696 | 2019-01-15 | Monkey | isolada        | Brazil | SP | ON022696 Brazil SP Monkey 2019-01-15 |
| ON022697 | 2018-01-03 | Monkey | PNH2874        | Brazil | SP | ON022697 Brazil SP Monkey 2018-01-03 |
| ON022698 | 2016-11-16 | Monkey | PNH72          | Brazil | SP | ON022698 Brazil SP Monkey 2016-11-16 |
| ON022699 | 2017-12-27 | Monkey | PNH2877        | Brazil | SP | ON022699 Brazil SP Monkey 2017-12-27 |
| ON022700 | 2016-11-17 | Monkey | PNH96          | Brazil | SP | ON022700 Brazil SP Monkey 2016-11-17 |
| ON022701 | 2016-11-17 | Monkey | PNH102         | Brazil | SP | ON022701 Brazil SP Monkey 2016-11-17 |
| ON022702 | 2016-11-07 | Monkey | PNH65          | Brazil | SP | ON022702 Brazil SP Monkey 2016-11-07 |
| ON022703 | 2016-11-04 | Monkey | PNH69          | Brazil | SP | ON022703 Brazil SP Monkey 2016-11-04 |
| ON022704 | 2017-03-31 | Monkey | PNH946         | Brazil | SP | ON022704 Brazil SP Monkey 2017-03-31 |
| ON022705 | 2017-04-10 | Monkey | PNH1258        | Brazil | SP | ON022705 Brazil SP Monkey 2017-04-10 |
| ON022706 | 2017-07-27 | Monkey | PNH1851        | Brazil | SP | ON022706 Brazil SP Monkey 2017-07-27 |
| ON022707 | 2017-12-16 | Monkey | PNH2670        | Brazil | SP | ON022707 Brazil SP Monkey 2017-12-16 |
| ON022708 | 2017-08-03 | Monkey | PNH1869        | Brazil | SP | ON022708 Brazil SP Monkey 2017-08-03 |
| ON022709 | 2017-12-18 | Monkey | PNH2662        | Brazil | SP | ON022709 Brazil SP Monkey 2017-12-18 |
| ON022710 | 2017-12-16 | Monkey | PNH2673        | Brazil | SP | ON022710 Brazil SP Monkey 2017-12-16 |
| ON022711 | 2017-12-14 | Monkey | PNH2676        | Brazil | SP | ON022711 Brazil SP Monkey 2017-12-14 |
| ON022712 | 2017-12-13 | Monkey | PNH2680        | Brazil | SP | ON022712 Brazil SP Monkey 2017-12-13 |
| ON022713 | 2017-11-06 | Monkey | PNH2631        | Brazil | SP | ON022713 Brazil SP Monkey 2017-11-06 |
| ON022714 | 2017-12-06 | Monkey | PNH2485        | Brazil | SP | ON022714 Brazil SP Monkey 2017-12-06 |
| ON022715 | 2017-11-15 | Monkey | PNH2505        | Brazil | SP | ON022715 Brazil SP Monkey 2017-11-15 |
| ON022716 | 2004-11-26 | Human  | 258595_isolado | Brazil |    | ON022716 Brazil  Human 2004-11-26    |
| ON022717 | 2000-01-18 | Human  | 188002_isolado | Brazil | SP | ON022717 Brazil SP Human 2000-01-18  |

|          |            |        |                |               |    |                                      |
|----------|------------|--------|----------------|---------------|----|--------------------------------------|
| ON022718 | 2000-04-27 | Human  | 189642_isolado | Brazil        | SP | ON022718 Brazil SP Human 2000-04-27  |
| ON022720 | 2000-01-18 | Human  | 188057_isolado | Brazil        | SP | ON022720 Brazil SP Human 2000-01-18  |
| ON022723 | 2017-01-27 | Monkey | 0441/2017      | Brazil        | ES | ON022723 Brazil ES Monkey 2017-01-27 |
| ON022724 | 2018-07-02 | Human  | 2501/2018      | Brazil        | RJ | ON022724 Brazil RJ Human 2018-07-02  |
| ON022726 | 2018-02-20 | Human  | 2538/2018      | Brazil        | RJ | ON022726 Brazil RJ Human 2018-02-20  |
| ON022727 | 2018-01-26 | Human  | 0869/2018      | Brazil        | RJ | ON022727 Brazil RJ Human 2018-01-26  |
| ON022728 | 2018-09-02 | Human  | 1778/2018      | Brazil        | RJ | ON022728 Brazil RJ Human 2018-09-02  |
| ON022730 | 2017-02-14 | Human  | 1344/2017      | Brazil        | ES | ON022730 Brazil ES Human 2017-02-14  |
| ON022731 | 2017-05-02 | Human  | 1262/2017      | Brazil        | ES | ON022731 Brazil ES Human 2017-05-02  |
| ON022732 | 2017-02-18 | Monkey | 1330/2017      | Brazil        | ES | ON022732 Brazil ES Monkey 2017-02-18 |
| ON022733 | 2018-06-04 | Monkey | 4838/2018      | Brazil        | RJ | ON022733 Brazil RJ Monkey 2018-06-04 |
| ON022734 | 2017-06-03 | Monkey | 2075/2017      | Brazil        | ES | ON022734 Brazil ES Monkey 2017-06-03 |
| ON022735 | 2017-06-06 | Monkey | 5884/2017      | Brazil        | RJ | ON022735 Brazil RJ Monkey 2017-06-06 |
| ON022736 | 2018-01-16 | Human  | ARB1019        | Brazil        | SP | ON022736 Brazil SP Human 2018-01-16  |
| ON022737 | 2018-01-19 | Human  | ARB1029        | Brazil        | SP | ON022737 Brazil SP Human 2018-01-19  |
| ON022738 | 2018-01-19 | Human  | ARB1030        | Brazil        | SP | ON022738 Brazil SP Human 2018-01-19  |
| ON022739 | 2018-01-23 | Human  | ARB1032        | Brazil        | SP | ON022739 Brazil SP Human 2018-01-23  |
| ON022740 | 2018-01-30 | Human  | ARB1045        | Brazil        | SP | ON022740 Brazil SP Human 2018-01-30  |
| ON022741 | 2018-02-01 | Human  | ARB1055        | Brazil        | SP | ON022741 Brazil SP Human 2018-02-01  |
| ON022742 | 2018-01-12 | Human  | ARB1014        | Brazil        | SP | ON022742 Brazil SP Human 2018-01-12  |
| ON022743 | 2018-01-16 | Human  | ARB1020        | Brazil        | SP | ON022743 Brazil SP Human 2018-01-16  |
| ON022744 | 2018-01-23 | Human  | ARB1036        | Brazil        | SP | ON022744 Brazil SP Human 2018-01-23  |
| ON022746 | 2018-XX-XX | Human  | ARB1051        | Brazil        | SP | ON022746 Brazil SP Human 2018-XX-XX  |
| ON245434 | 2020-02-XX | Human  |                | Nigeria       |    | ON245434 Nigeria  Human 2020-02-XX   |
| ON245435 | 2020-11-XX | Human  |                | Nigeria       |    | ON245435 Nigeria  Human 2020-11-XX   |
| DQ118157 | 2004-XX-XX |        |                | Spain         |    | DQ118157 Spain 2004-XX-XX            |
| GQ379162 | 2007-10-XX |        |                | Peru          |    | GQ379162 Peru 2007-10-XX             |
| GQ379163 | 2007-10-XX |        |                | Peru          |    | GQ379163 Peru 2007-10-XX             |
| JN620362 | 2010-10-XX |        |                | Uganda        |    | JN620362 Uganda 2010-10-XX           |
| JX898868 | 1995-XX-XX |        |                | Senegal       |    | JX898868 Senegal 1995-XX-XX          |
| JX898869 | 1973-XX-XX |        |                | Cote_d_ivoire |    | JX898869 Cote_d_ivoire 1973-XX-XX    |
| JX898870 | 1996-XX-XX |        |                | Senegal       |    | JX898870 Senegal 1996-XX-XX          |
| JX898871 | 1995-XX-XX |        |                | Senegal       |    | JX898871 Senegal 1995-XX-XX          |
| JX898872 | 1995-XX-XX |        |                | Senegal       |    | JX898872 Senegal 1995-XX-XX          |

|          |            |               |                                   |
|----------|------------|---------------|-----------------------------------|
| JX898873 | 2000-XX-XX | Senegal       | JX898873 Senegal 2000-XX-XX       |
| JX898874 | 2000-XX-XX | Senegal       | JX898874 Senegal 2000-XX-XX       |
| JX898875 | 2000-XX-XX | Senegal       | JX898875 Senegal 2000-XX-XX       |
| JX898876 | 2001-XX-XX | Senegal       | JX898876 Senegal 2001-XX-XX       |
| JX898877 | 2005-XX-XX | Senegal       | JX898877 Senegal 2005-XX-XX       |
| JX898878 | 2005-XX-XX | Senegal       | JX898878 Senegal 2005-XX-XX       |
| JX898879 | 2005-XX-XX | Senegal       | JX898879 Senegal 2005-XX-XX       |
| JX898880 | 2005-XX-XX | Senegal       | JX898880 Senegal 2005-XX-XX       |
| JX898881 | 2005-XX-XX | Senegal       | JX898881 Senegal 2005-XX-XX       |
| KU921608 | 2016-03-10 | China         | KU921608 China 2016-03-10         |
| KU978763 | 2016-03-09 |               | KU978763  2016-03-09              |
| KU978764 | 1946-XX-XX | Nigeria       | KU978764 Nigeria 1946-XX-XX       |
| KU978765 | 1941-06-06 | Sudan         | KU978765 Sudan 1941-06-06         |
| KX010994 | 1965-08-23 | Guinea-bissau | KX010994 Guinea-bissau 1965-08-23 |
| KX010995 | 2016-03-11 | China         | KX010995 China 2016-03-11         |
| KX010996 | 2016-03-17 | China         | KX010996 China 2016-03-17         |
| KX027336 | 2016-03-18 | China         | KX027336 China 2016-03-18         |
| KX268355 | 2016-03-19 | China         | KX268355 China 2016-03-19         |
| KX982182 | 2016-03-11 | China         | KX982182 China 2016-03-11         |
| KY495641 | 2016-03-16 | Angola        | KY495641 Angola 2016-03-16        |
| KY587416 | 2016-03-11 | China         | KY587416 China 2016-03-11         |
| KY873606 | 2016-03-14 | China         | KY873606 China 2016-03-14         |
| KY873607 | 2016-03-21 | China         | KY873607 China 2016-03-21         |
| KY873608 | 2016-03-23 | China         | KY873608 China 2016-03-23         |
| MF004382 | 1999-01-01 | Bolivia       | MF004382 Bolivia 1999-01-01       |
| MF289572 | 2017-06-XX | Singapore     | MF289572 Singapore 2017-06-XX     |
| MF405338 | 1927-XX-XX | Ghana         | MF405338 Ghana 1927-XX-XX         |
| MF926243 | 2015-XX-XX | France        | MF926243 France 2015-XX-XX        |
| MG589641 | 2016-03-18 | China         | MG589641 China 2016-03-18         |
| MG922934 | 2017-XX-XX | Germany       | MG922934 Germany 2017-XX-XX       |
| MH633684 | 2016-XX-XX | China         | MH633684 China 2016-XX-XX         |
| MH633685 | 2016-XX-XX | China         | MH633685 China 2016-XX-XX         |
| MH633686 | 2016-XX-XX | China         | MH633686 China 2016-XX-XX         |
| MH633687 | 2016-XX-XX | China         | MH633687 China 2016-XX-XX         |

|          |            |             |                                 |
|----------|------------|-------------|---------------------------------|
| MH633688 | 2016-XX-XX | China       | MH633688 China 2016-XX-XX       |
| MH633689 | 2016-XX-XX | China       | MH633689 China 2016-XX-XX       |
| MH633690 | 2016-XX-XX | China       | MH633690 China 2016-XX-XX       |
| MH633691 | 2016-XX-XX | China       | MH633691 China 2016-XX-XX       |
| MH633692 | 2016-XX-XX | China       | MH633692 China 2016-XX-XX       |
| MK060080 | 1979-10-30 | Senegal     | MK060080 Senegal 1979-10-30     |
| MK292067 | 2018-11-19 | Netherlands | MK292067 Netherlands 2018-11-19 |
| MK457701 | 2018-10-22 | Nigeria     | MK457701 Nigeria 2018-10-22     |
| MN958078 | 2018-XX-XX | Nigeria     | MN958078 Nigeria 2018-XX-XX     |
