# Supplementary material for: Yellow Fever Virus Maintained by Sabethes Mosquitoes during the Dry Season in Cerrado, a Semiarid Region of Brazil, in 2021
Source: MDPI journal article supplement (doi:10.3390/v15030757), 2023-03-15
Supplement: s1 [file s1]

**Supplementary Table S1:** Number of *Sabethes* mosquitoes captured every 15 minutes, from September 26 to October 1, 2021, in Ubaí and Icaraí de Minas, northern MG. The average temperature and relative humidity measured during the sampling are shown.

| Time          | <i>Sa. chloropterus</i> | <i>Sa. albiprivus</i> | Mean humidity (%) | Mean temperature (°C) |
|---------------|-------------------------|-----------------------|-------------------|-----------------------|
| 07:45 - 07:59 | 2                       | 0                     | 65,0              | 24,1                  |
| 08:00 - 08:14 | 2                       | 0                     | 63,0              | 24,4                  |
| 08:15 - 08:29 | 0                       | 4                     | 48,3              | 28,2                  |
| 08:30 - 08:44 | 0                       | 2                     | 50,5              | 27,8                  |
| 08:45 - 08:59 | 2                       | 1                     | 51,3              | 28,8                  |
| 09:00 - 09:14 | 1                       | 1                     | 46,5              | 29,0                  |
| 09:15 - 09:29 | 2                       | 1                     | 46,7              | 29,5                  |
| 09:30 - 09:44 | 2                       | 2                     | 40,8              | 30,6                  |
| 09:45 - 09:59 | 0                       | 0                     | 40,7              | 30,0                  |
| 10:00 - 10:14 | 0                       | 2                     | 43,5              | 31,5                  |
| 10:15 - 10:29 | 1                       | 1                     | 36,0              | 32,6                  |
| 10:30 - 10:44 | 0                       | 1                     | 42,0              | 32,8                  |
| 10:45 - 10:59 | 0                       | 0                     | 31,0              | 34,2                  |
| 11:00 - 11:14 | 1                       | 0                     | 34,0              | 33,2                  |
| 11:15 - 11:29 | 0                       | 0                     | 33,5              | 33,6                  |
| 11:30 - 11:44 | 0                       | 0                     | 33,0              | 33,9                  |
| 11:45 - 11:59 | 0                       | 0                     | 32,5              | 33,7                  |
| 12:00 - 12:14 | 0                       | 0                     | 32,5              | 34,0                  |
| 12:15 - 12:29 | 0                       | 0                     | 32,5              | 34,0                  |
| 12:30 - 12:44 | 0                       | 0                     | 32,5              | 34,0                  |
| 12:45 - 12:59 | 0                       | 0                     | 32,5              | 34,0                  |
| 13:00 - 13:14 | 0                       | 0                     | 32,5              | 34,2                  |
| 13:15 - 13:29 | 0                       | 0                     | 32,0              | 34,3                  |
| 13:30 - 13:44 | 0                       | 0                     | 31,5              | 34,5                  |
| 13:45 - 13:59 | 0                       | 0                     | 30,5              | 34,9                  |
| 14:00 - 14:14 | 1                       | 1                     | 28,5              | 35,2                  |
| 14:15 - 14:29 | 2                       | 0                     | 29,5              | 35,7                  |
| 14:30 - 14:44 | 0                       | 0                     | 34,0              | 35,7                  |
| 14:45 - 14:59 | 4                       | 3                     | 30,0              | 33,8                  |
| 15:00 - 15:14 | 9                       | 10                    | 32,1              | 32,4                  |
| 15:15 - 15:29 | 10                      | 6                     | 36,8              | 31,0                  |
| 15:30 - 15:44 | 13                      | 8                     | 34,0              | 32,0                  |
| 15:45 - 15:59 | 11                      | 12                    | 32,3              | 32,5                  |
| 16:00 - 16:14 | 24                      | 7                     | 28,9              | 34,2                  |
| 16:15 - 16:29 | 32                      | 34                    | 33,5              | 33,0                  |
| 16:30 - 16:44 | 41                      | 41                    | 34,4              | 32,4                  |
| 16:45 - 16:59 | 64                      | 42                    | 34,0              | 32,1                  |
| 17:00 - 17:14 | 55                      | 34                    | 33,8              | 32,1                  |
| 17:15 - 17:29 | 44                      | 19                    | 36,0              | 31,3                  |
| 17:30 - 17:44 | 26                      | 7                     | 33,7              | 30,9                  |
| 17:45 - 17:59 | 3                       | 1                     | 35,2              | 30,3                  |

|               |   |   |      |      |
|---------------|---|---|------|------|
| 18:00 - 18:14 | 1 | 0 | 45,0 | 29,9 |
| 18:15 - 18:29 | 0 | 0 | 45,0 | 29,9 |
| 18:30 - 18:45 | 0 | 1 | 54,0 | 26,0 |

---
